# Supplementary material for: Single-Cell RNA-seq Reveals Characteristics of Malignant Cells and Immune Microenvironment in Subcutaneous Panniculitis-Like T-Cell Lymphoma
Source: Front Oncol. 2021 Mar 18;11:611580. doi: 10.3389/fonc.2021.611580 (PMC8013729; doi:10.3389/fonc.2021.611580)
Supplement: Supplementary file 1 [file DataSheet_1.pdf]

## B cells

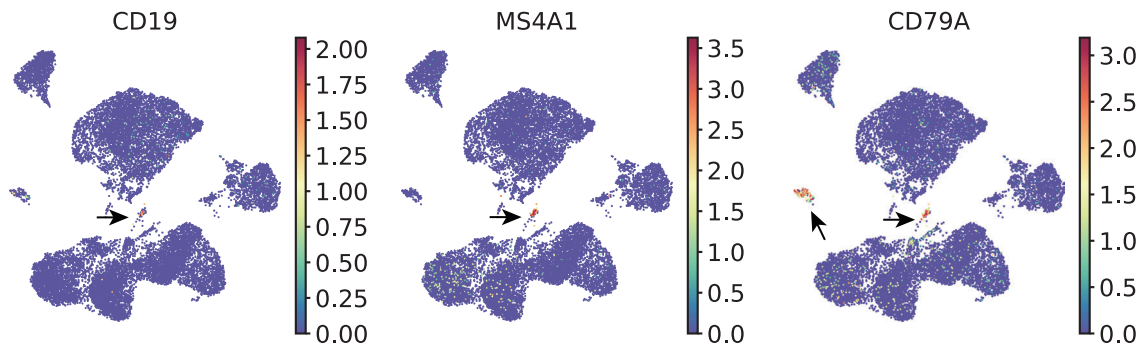

## T cells

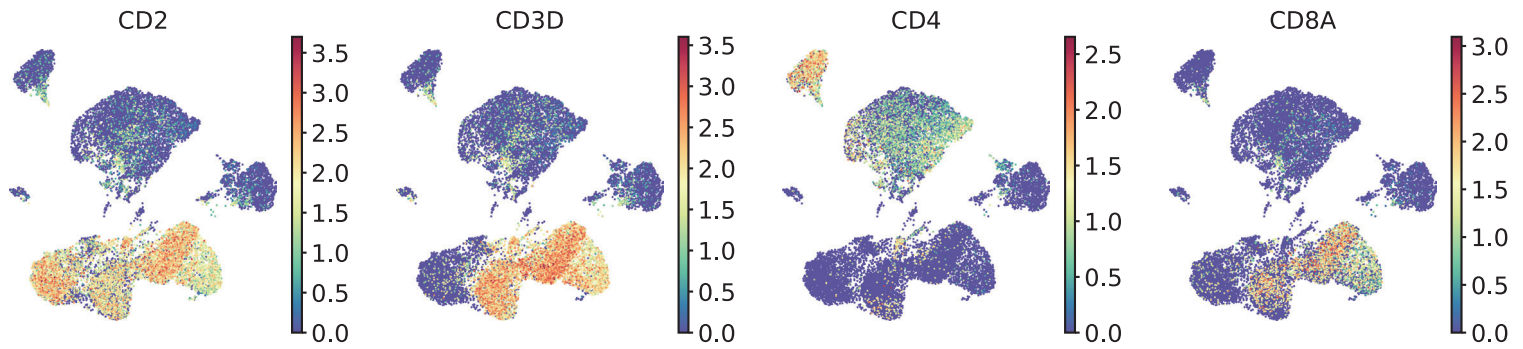

## Naive T cells

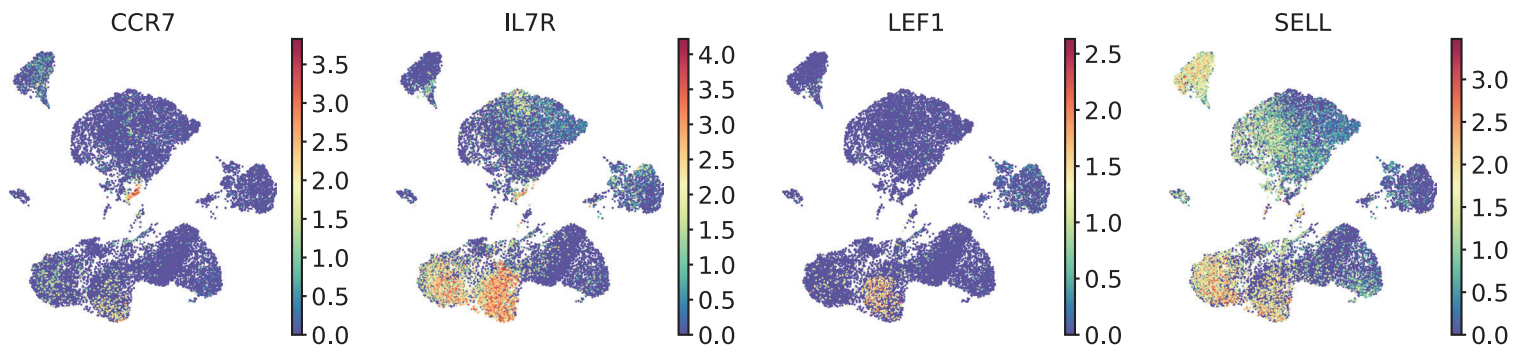

## Treg cells

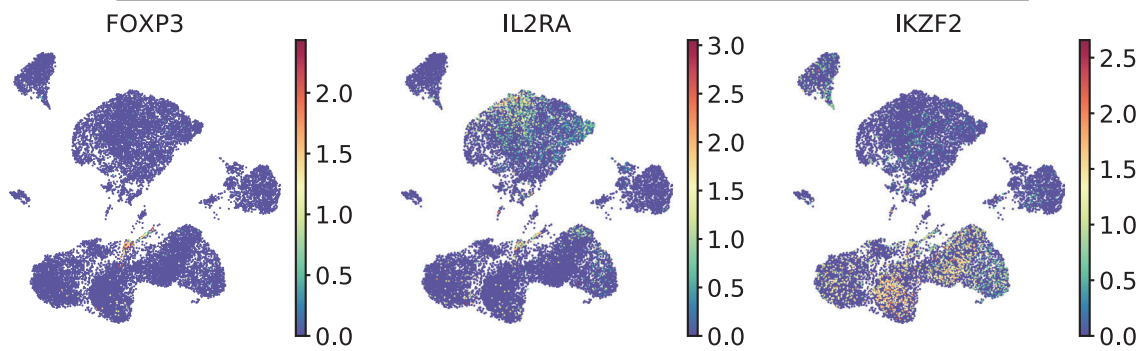

## NK cells

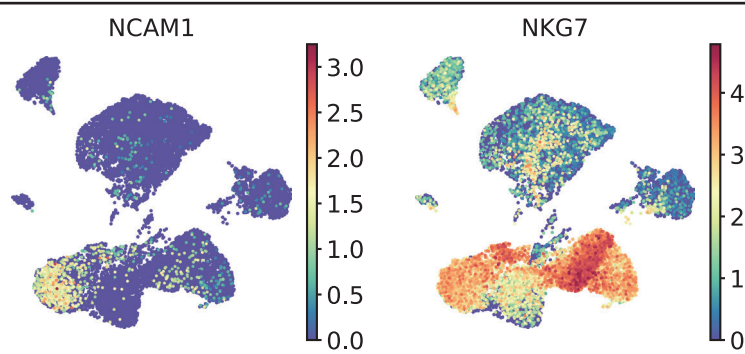

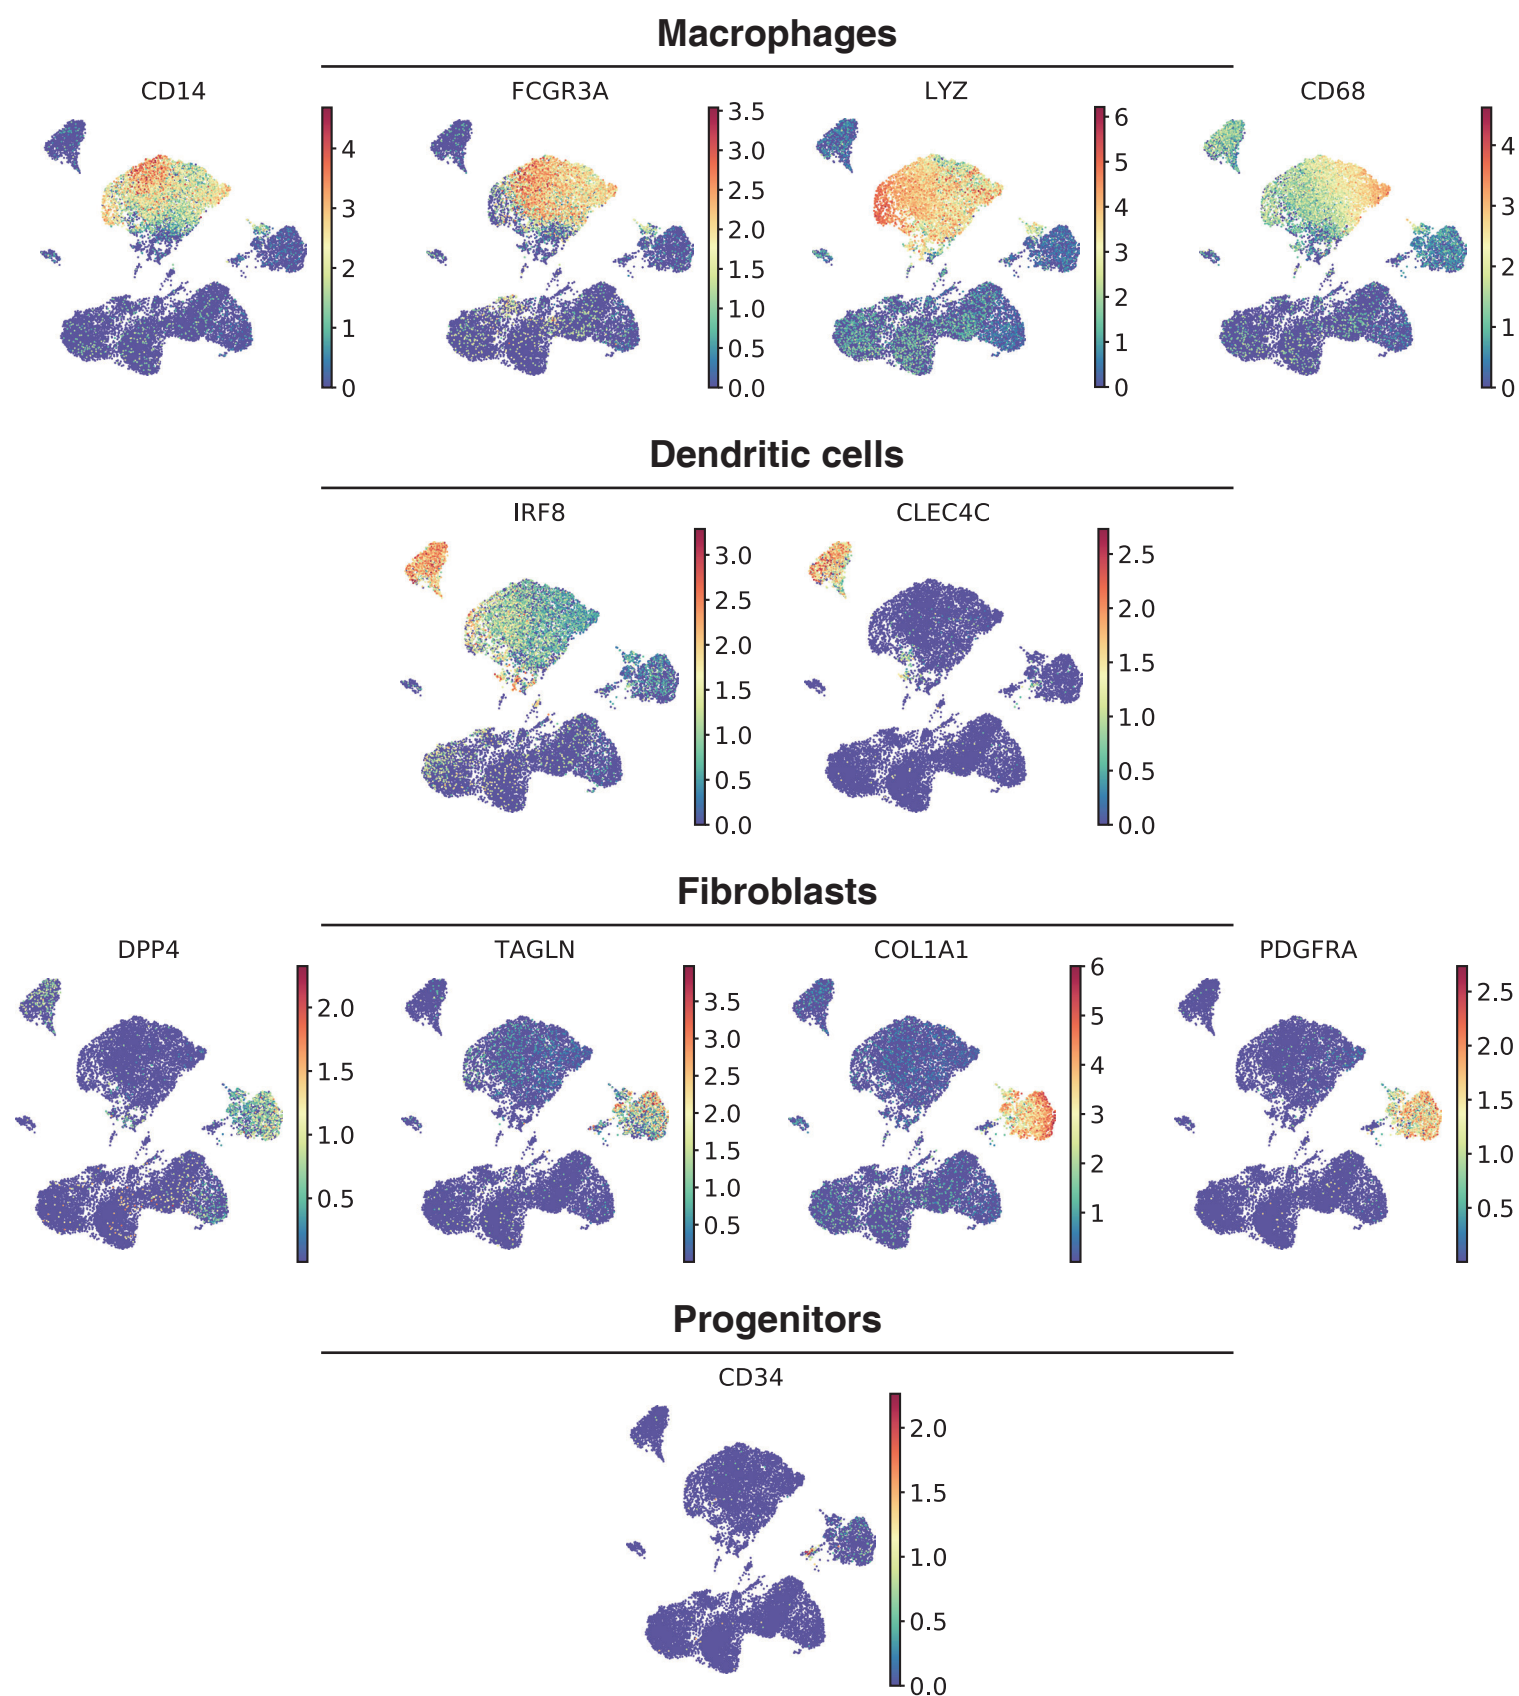

**Supplemental Figure S1.** The canonical marker genes expression for cell-type annotation of cells from the patient's subcutaneous lesion, related to Figure 2A-B.

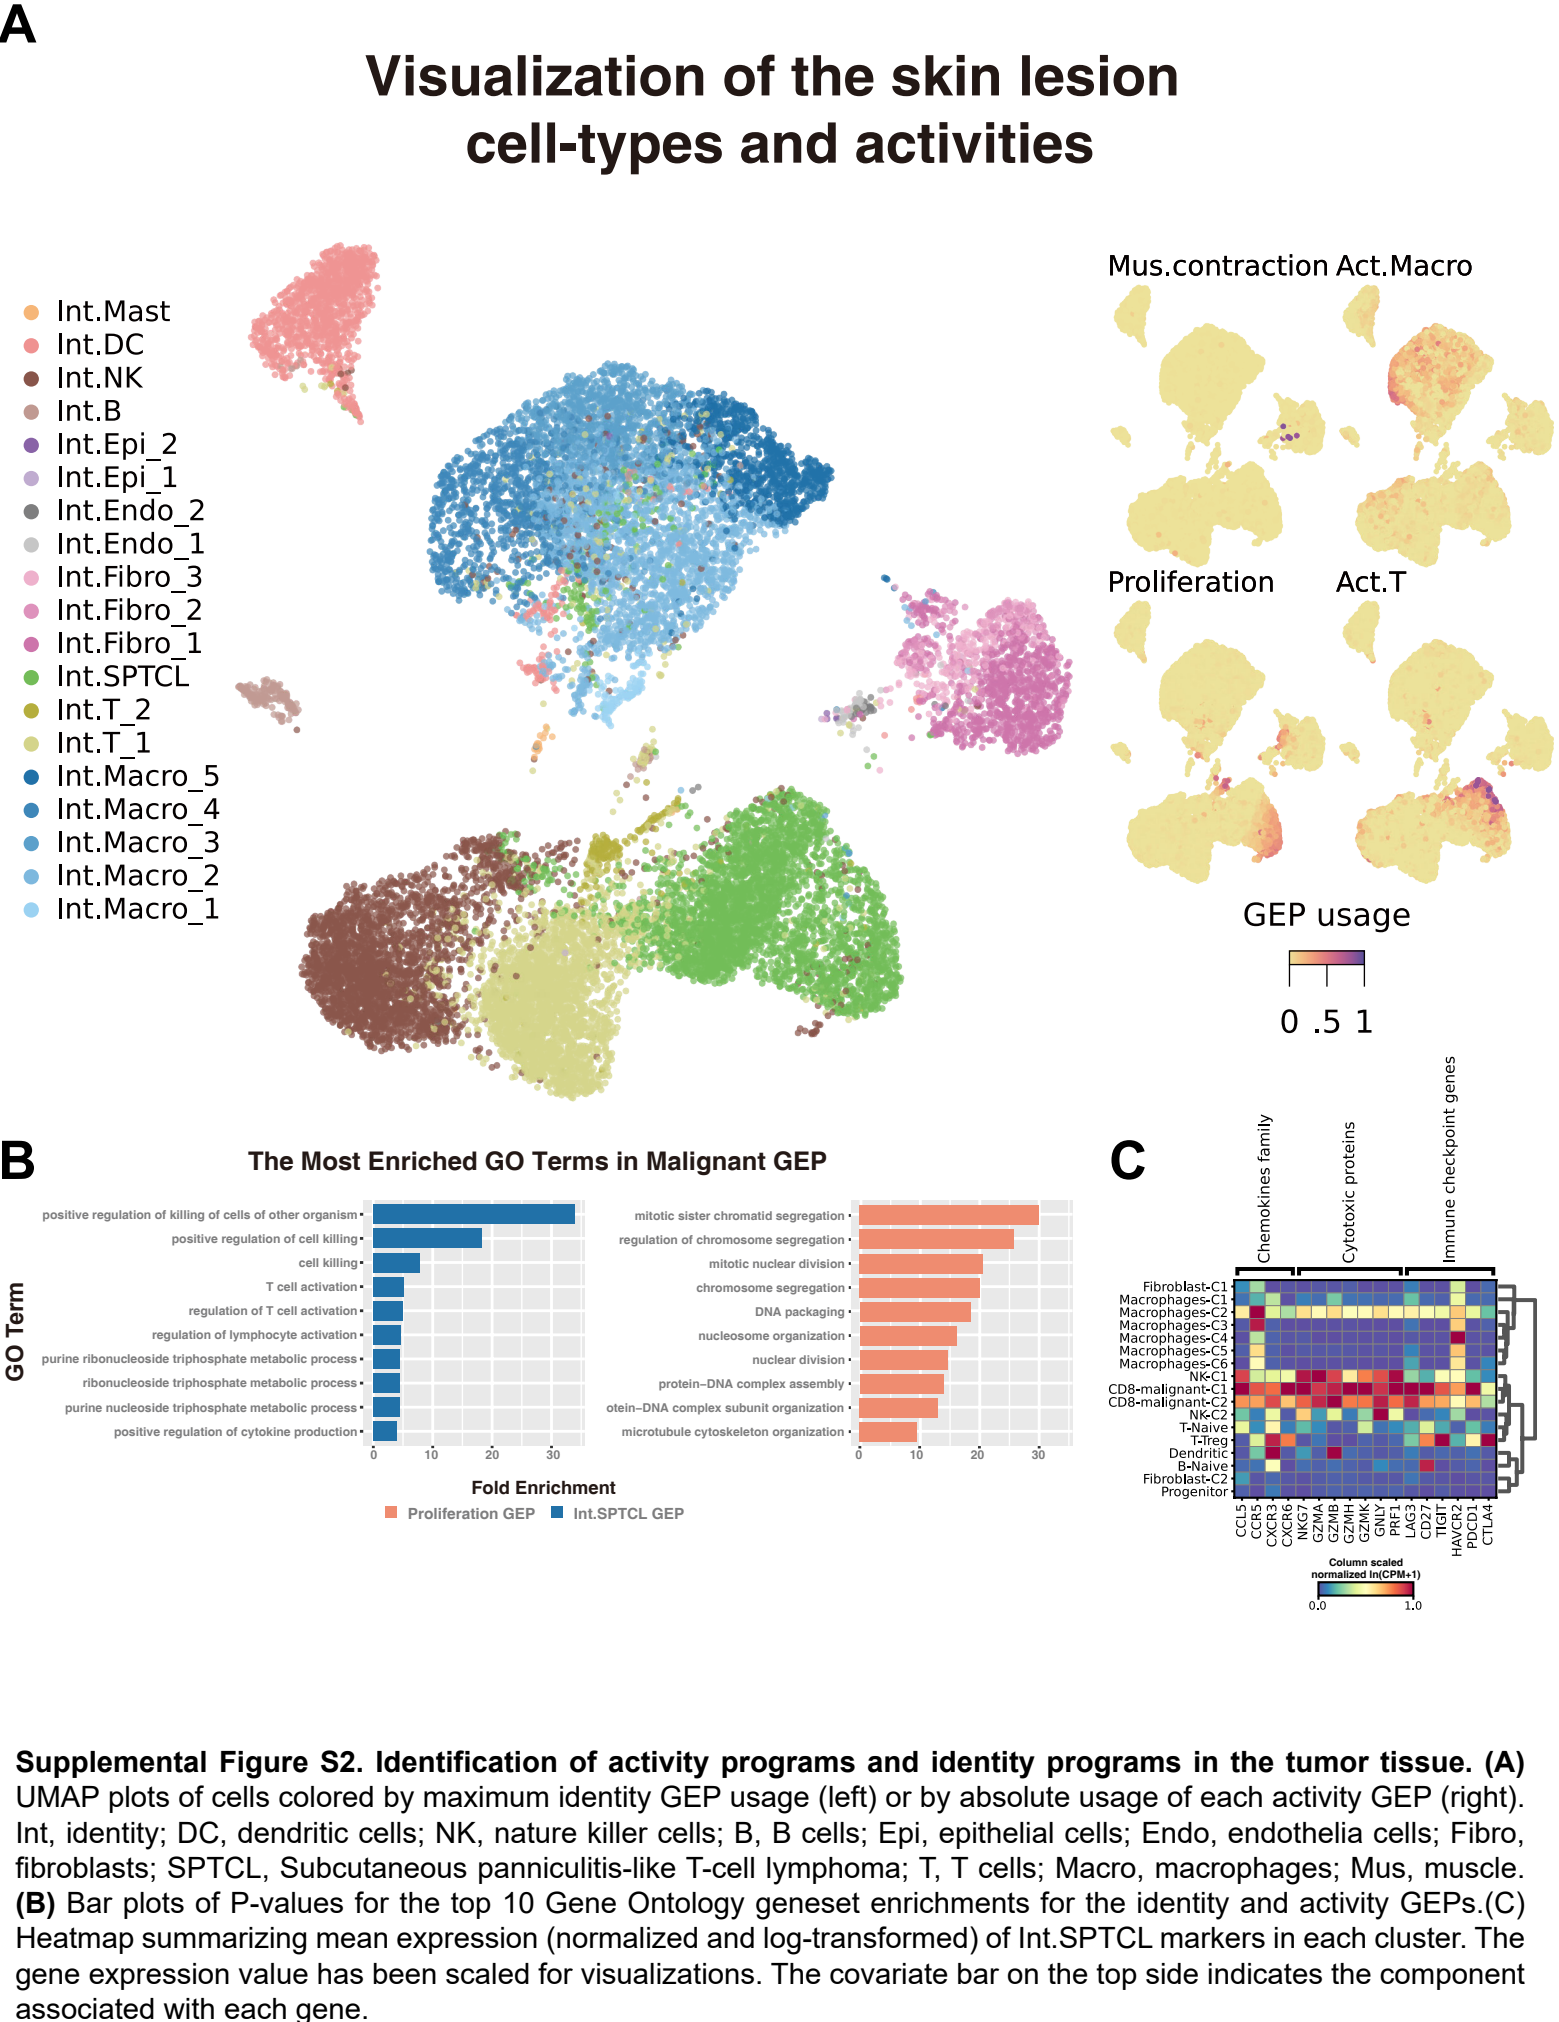

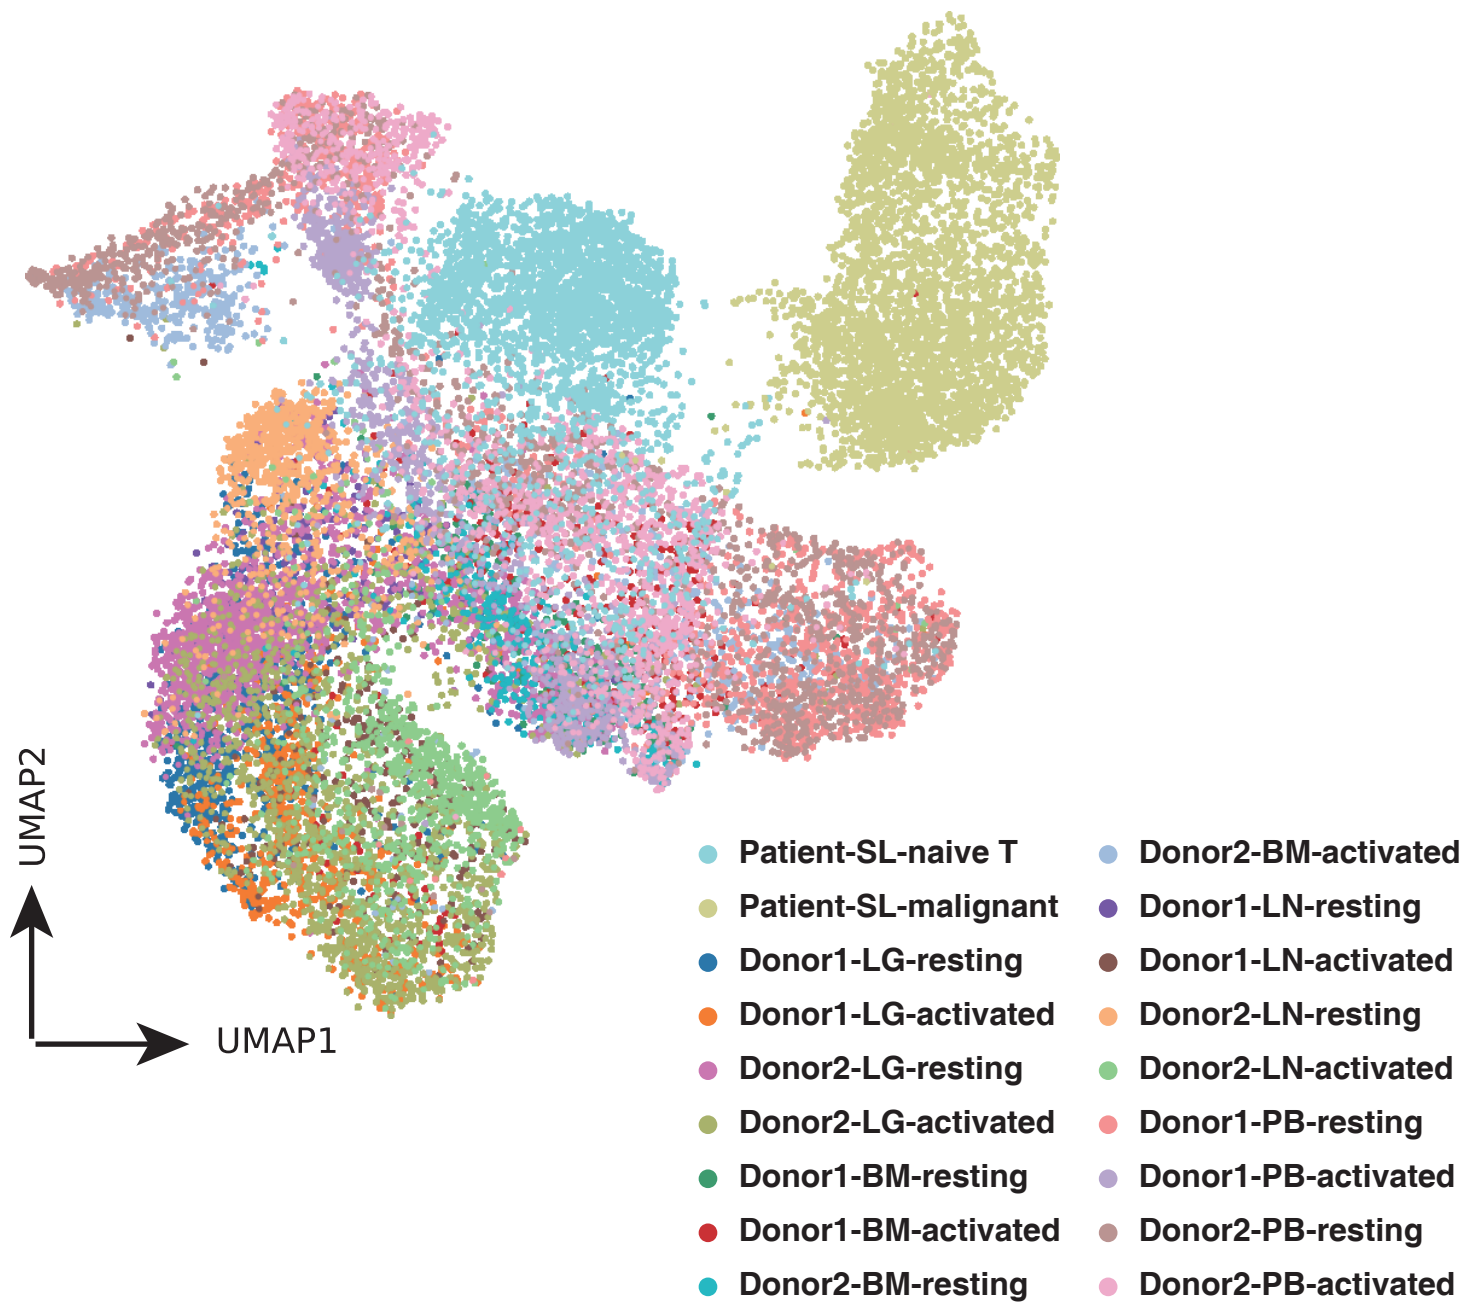

**Supplemental Figure S3.** UMAP projection of donors' samples with normal CD8<sup>+</sup> T cells (n=13,494) and patient sample with CD8<sup>+</sup> cells (n=5,956) in subcutaneous lesion tissue, related to Figure 2. BM, bone marrow; LG, lung; LN, lymph node; PB, peripheral blood; resting; SL, subcutaneous lesion; CD3<sup>+</sup> T cells isolated from tissues and blood were cultured in media alone; activated, in the presence of anti-CD3/anti-CD28 antibodies.

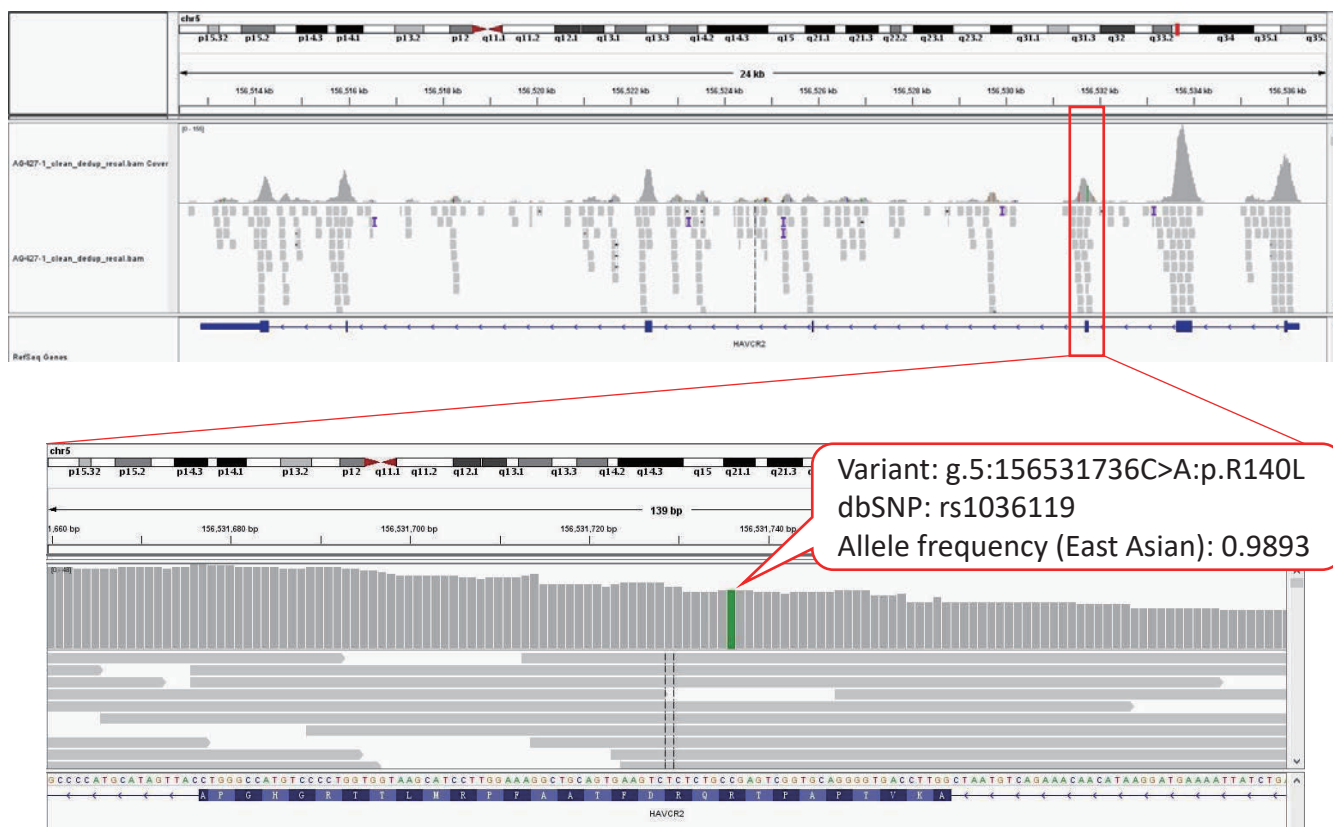

**Supplemental Figure S4. Integrative genomics view of the *HAVCR2* genotype with whole-exome sequencing in the patient's subcutaneous lesion tissue.** The result showed that there was no coding mutation existed in the *HAVCR2* gene, except for a common coding SNP (p.R140L, rs1036119) with allele frequency 0.9893 in East Asian population based on the genome aggregation database (gnomAD v2.1.1).

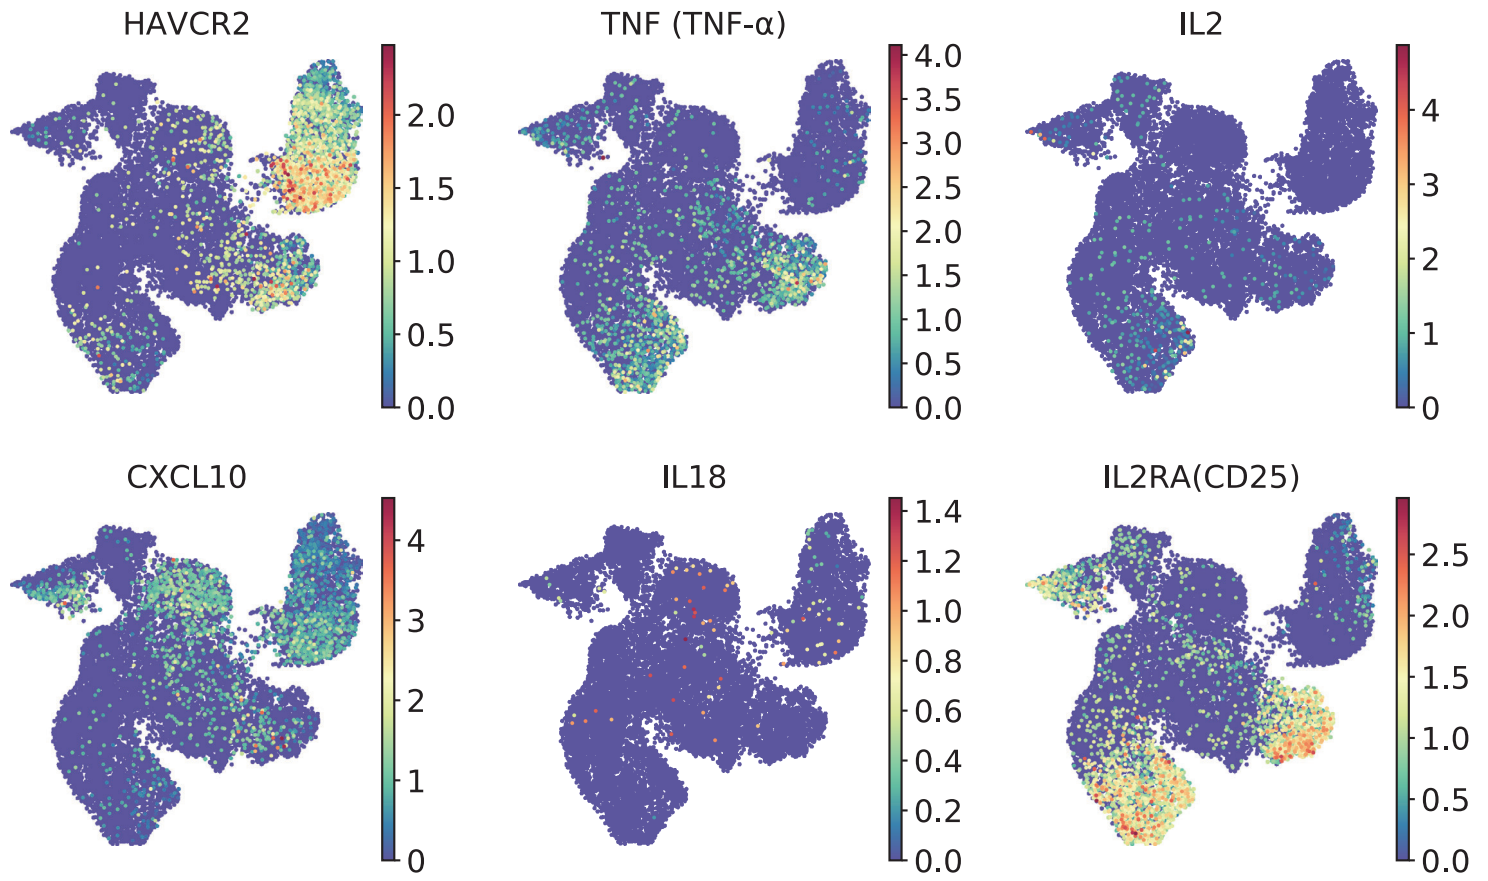

**Supplemental Figure S5. UMAP embedding of three gene expression (*HAVCR2*, *TNF*, *IL2*, *CXCL10*, *IL18*, *IL2RA*).** The results showed that the SPTCL malignant cells with no mutations of *HAVCR2* had regular expression of *HAVCR2* and *CXCL10* and low expression of *TNF*, *IL2*, *IL18*, and *IL2RA* compared with normal T cells.

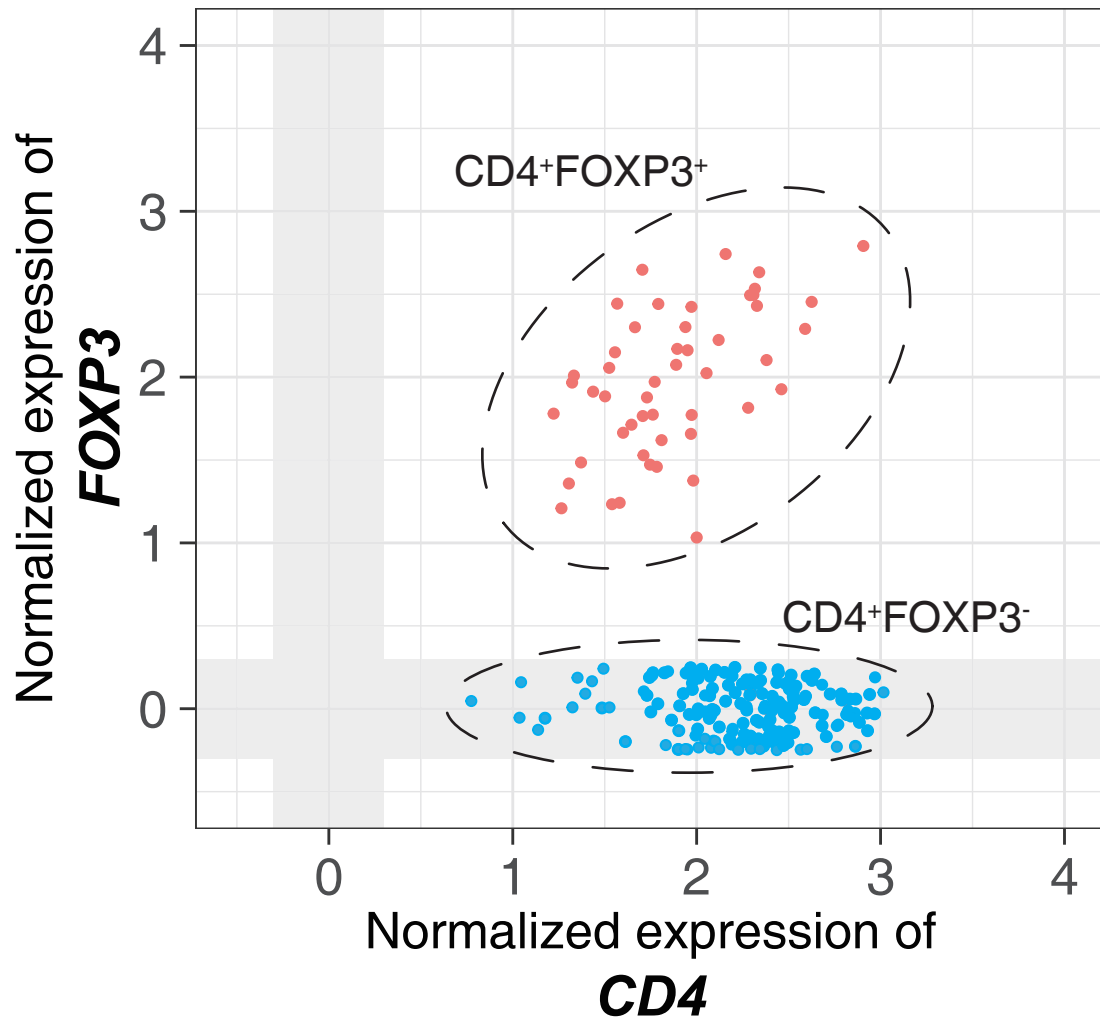

**Supplemental Figure S6.** Dot plots show gene expression of *CD4* and *FOXP3* for the CD4<sup>+</sup> T cells of the subcutaneous lesion sample of the SPTCL patient studied. CD4<sup>+</sup>FOXP3<sup>+</sup> T cells were colored in red, CD4<sup>+</sup>FOXP3<sup>-</sup> T cells were colored in blue. We calculated the percentage (21.97%) of CD4<sup>+</sup>FOXP3<sup>+</sup> T cells in CD4<sup>+</sup> T cells to estimate the proportion of Tregs in subcutaneous lesion.

## Integration of SL-CD8<sup>+</sup> and donors' normal CD8<sup>+</sup> cells

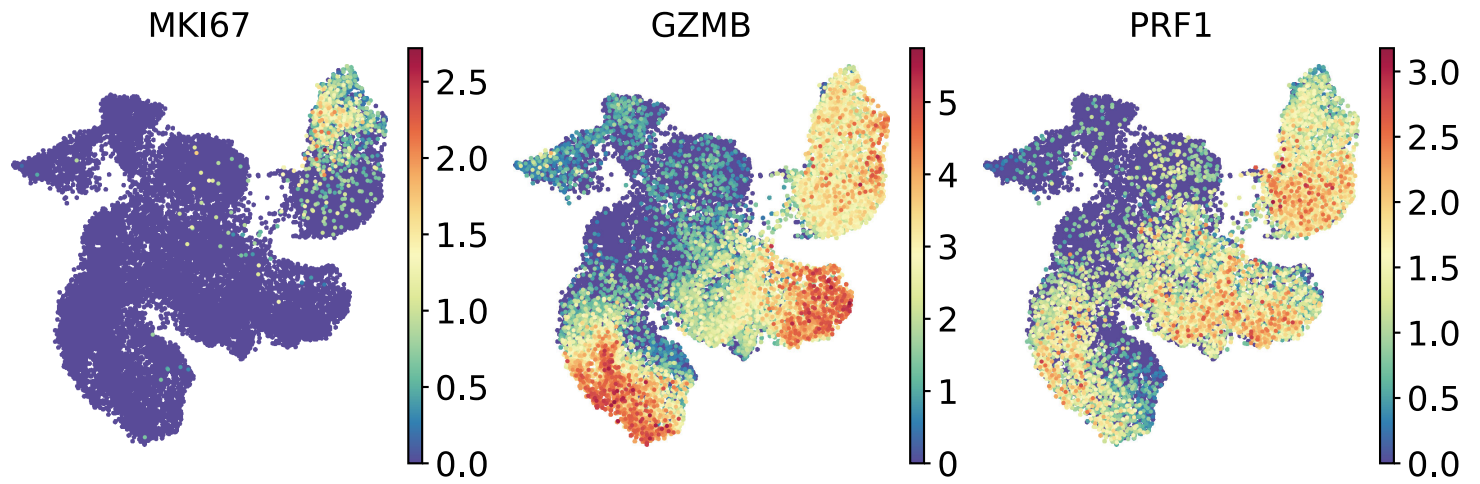

**Supplemental Figure S7.** Integration UMAP projects of known markers used to diagnose SPTCL. SL, subcutaneous lesion.

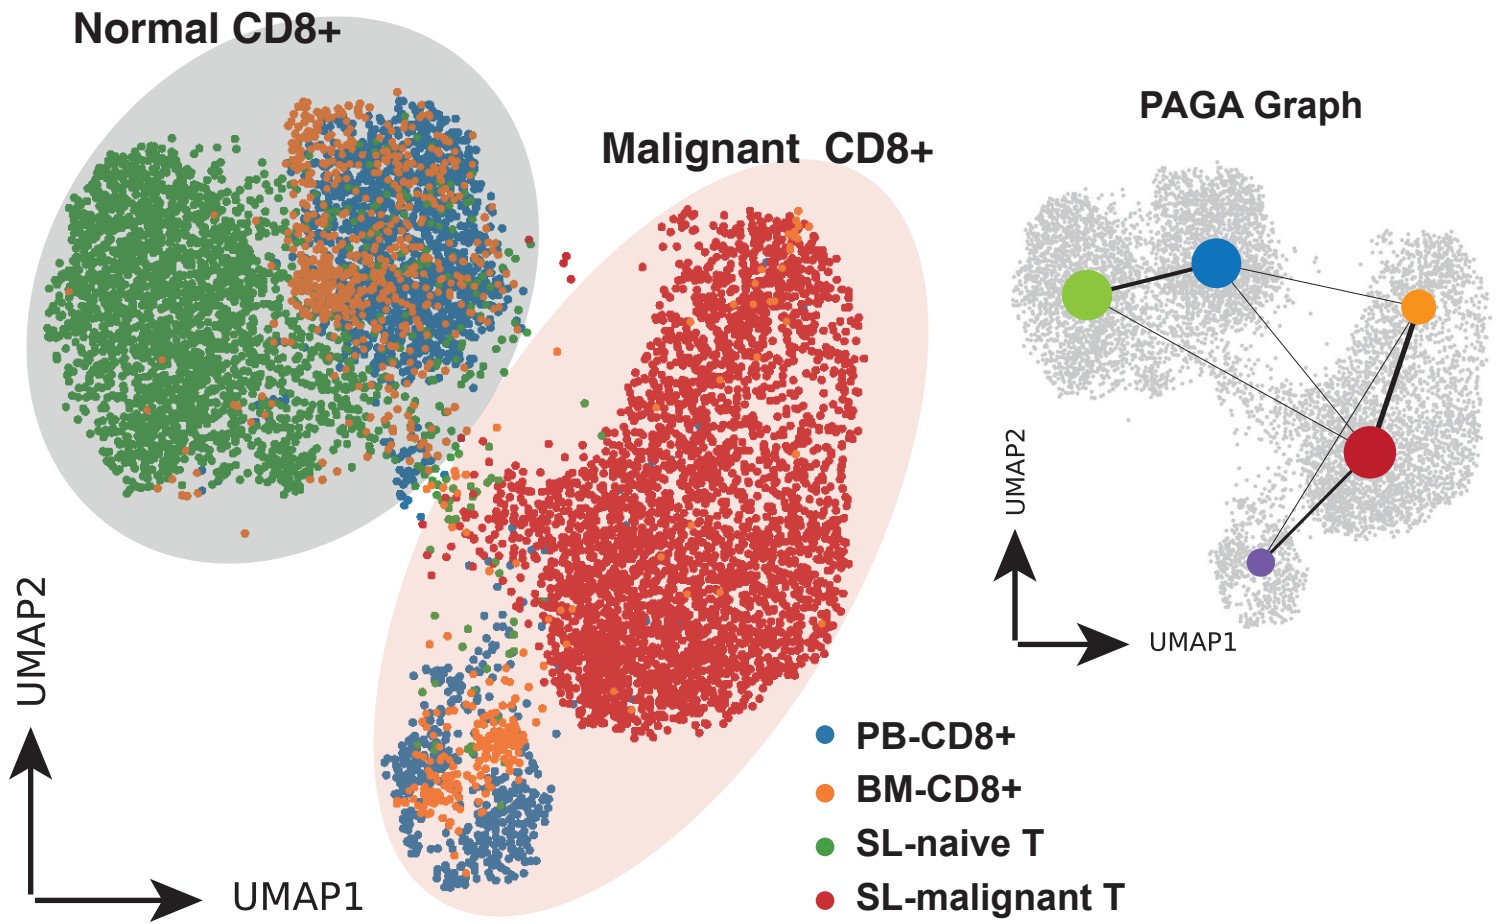

**Supplemental Figure S8. Transcriptomic comparison of CD8<sup>+</sup> T cells from the patient peripheral blood, bone marrow, tumor tissue, related to Figure 3. (A)** UMAP projection of patient sample with normal CD8<sup>+</sup> T cells outlined in grey and malignant CD8<sup>+</sup> cells in orange. BM, bone marrow; PB, peripheral blood; SL, subcutaneous lesion. **(B)** Cells are colored with various clustering by the Leiden algorithm. Results of partition-based graph abstraction (PAGA).

## Integration of SL-CD8<sup>+</sup> cells and matched PB/BM CD8<sup>+</sup> cells

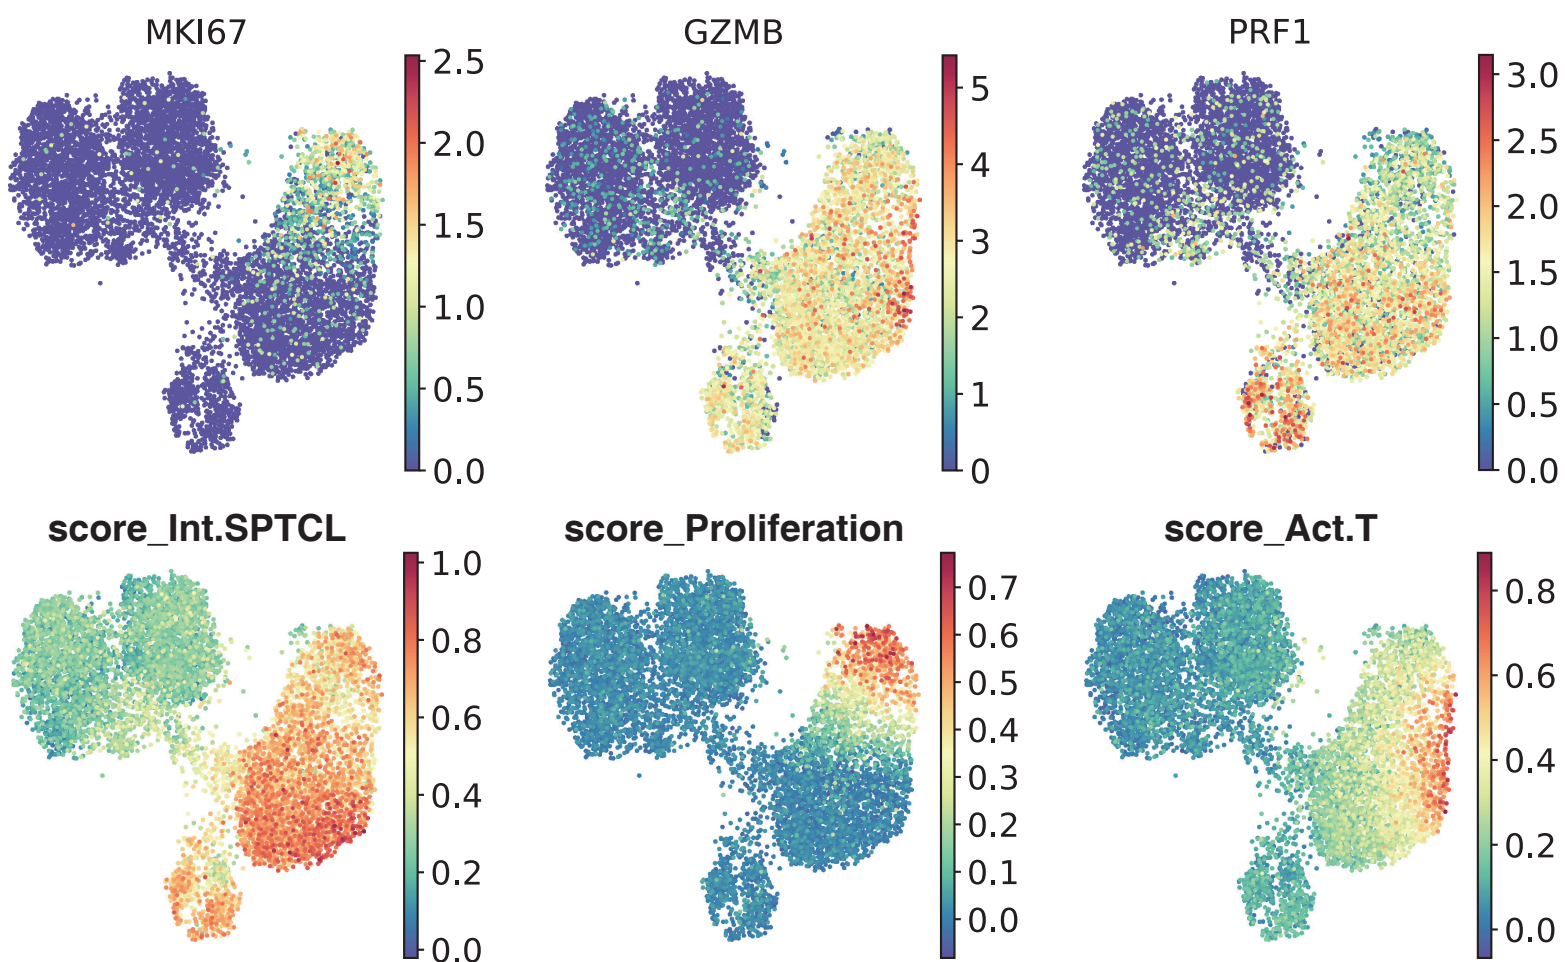

**Supplemental Figure S9.** Results of known markers and GEP-program cell scores in UMAP space (first two dimensions). BM, bone marrow; PB, peripheral blood; SL, subcutaneous lesion.

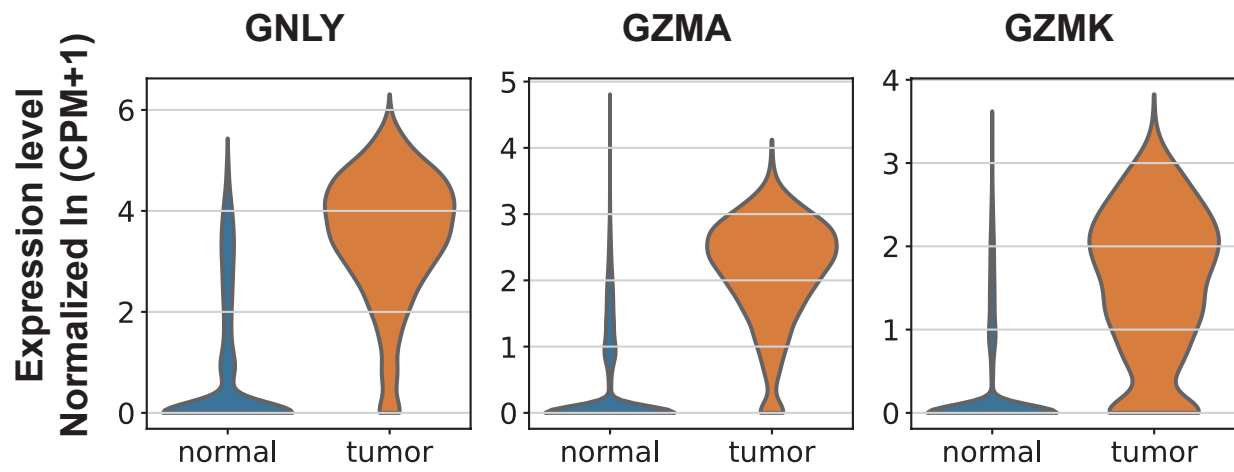

Supplemental Figure S10. Violin plots of known markers of SPTCL (adjusted  $P < 1e-10$ ).

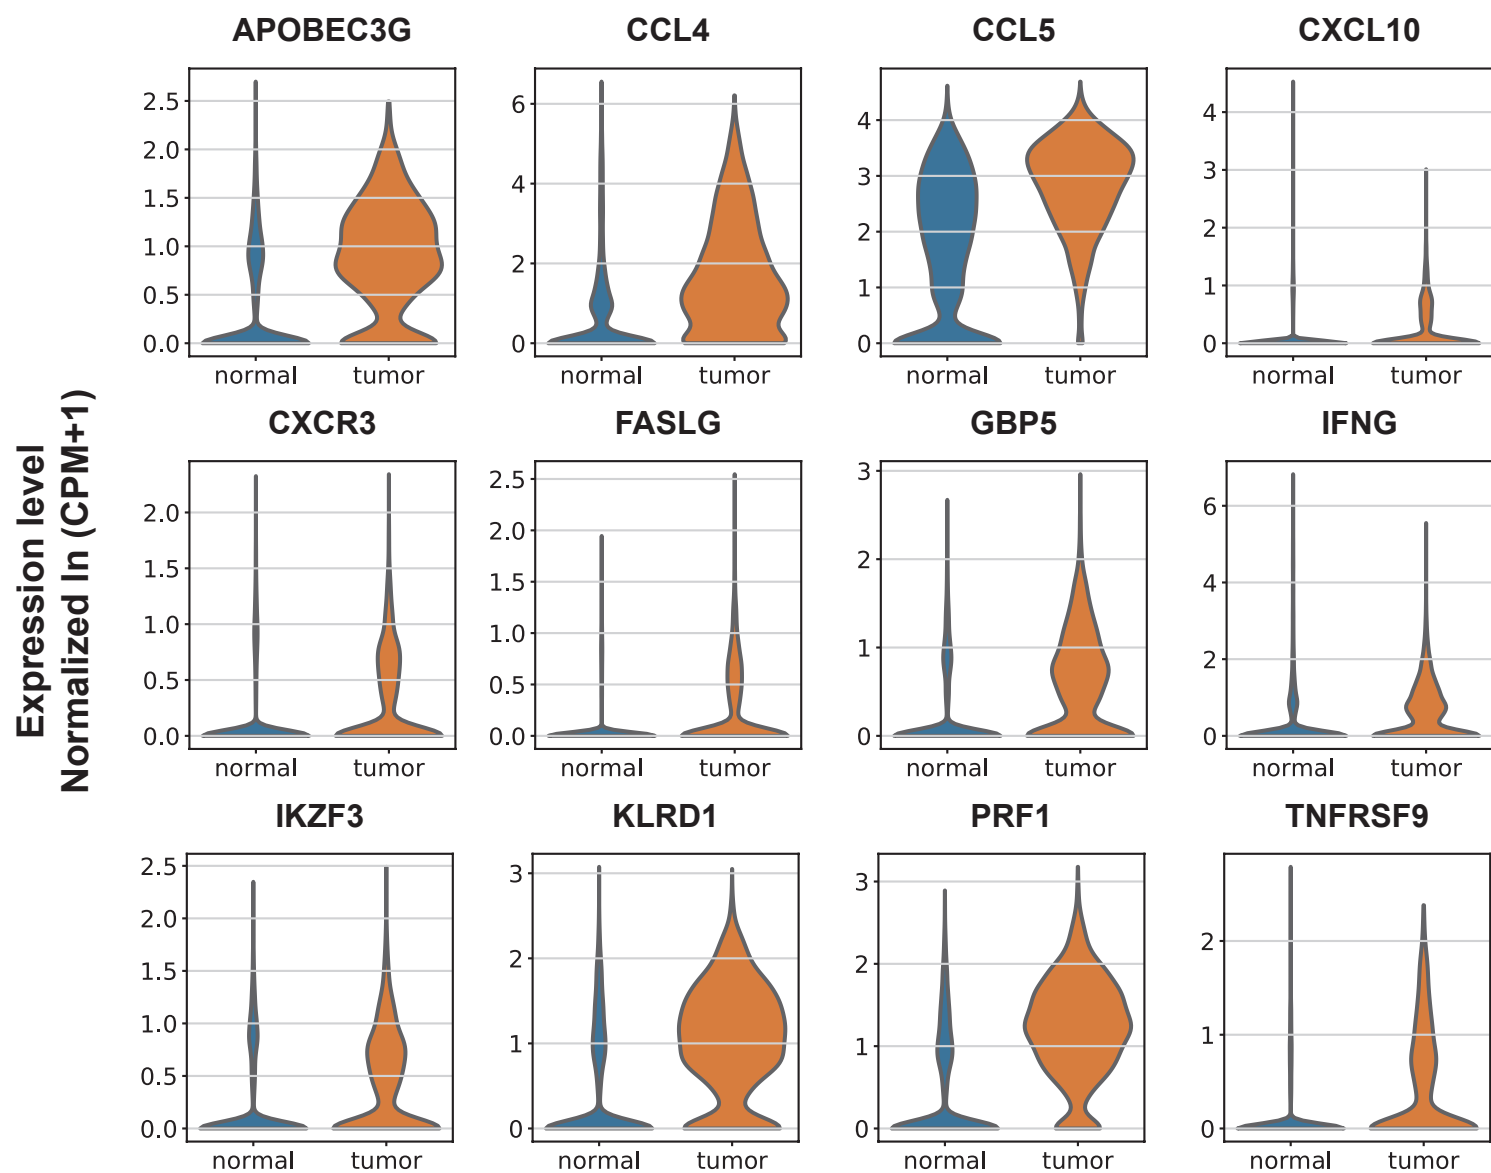

**Supplemental Figure S11. Violin plots showing previously identified gene expression of SPTCL cells (adjusted  $P < 1e-10$ ).**

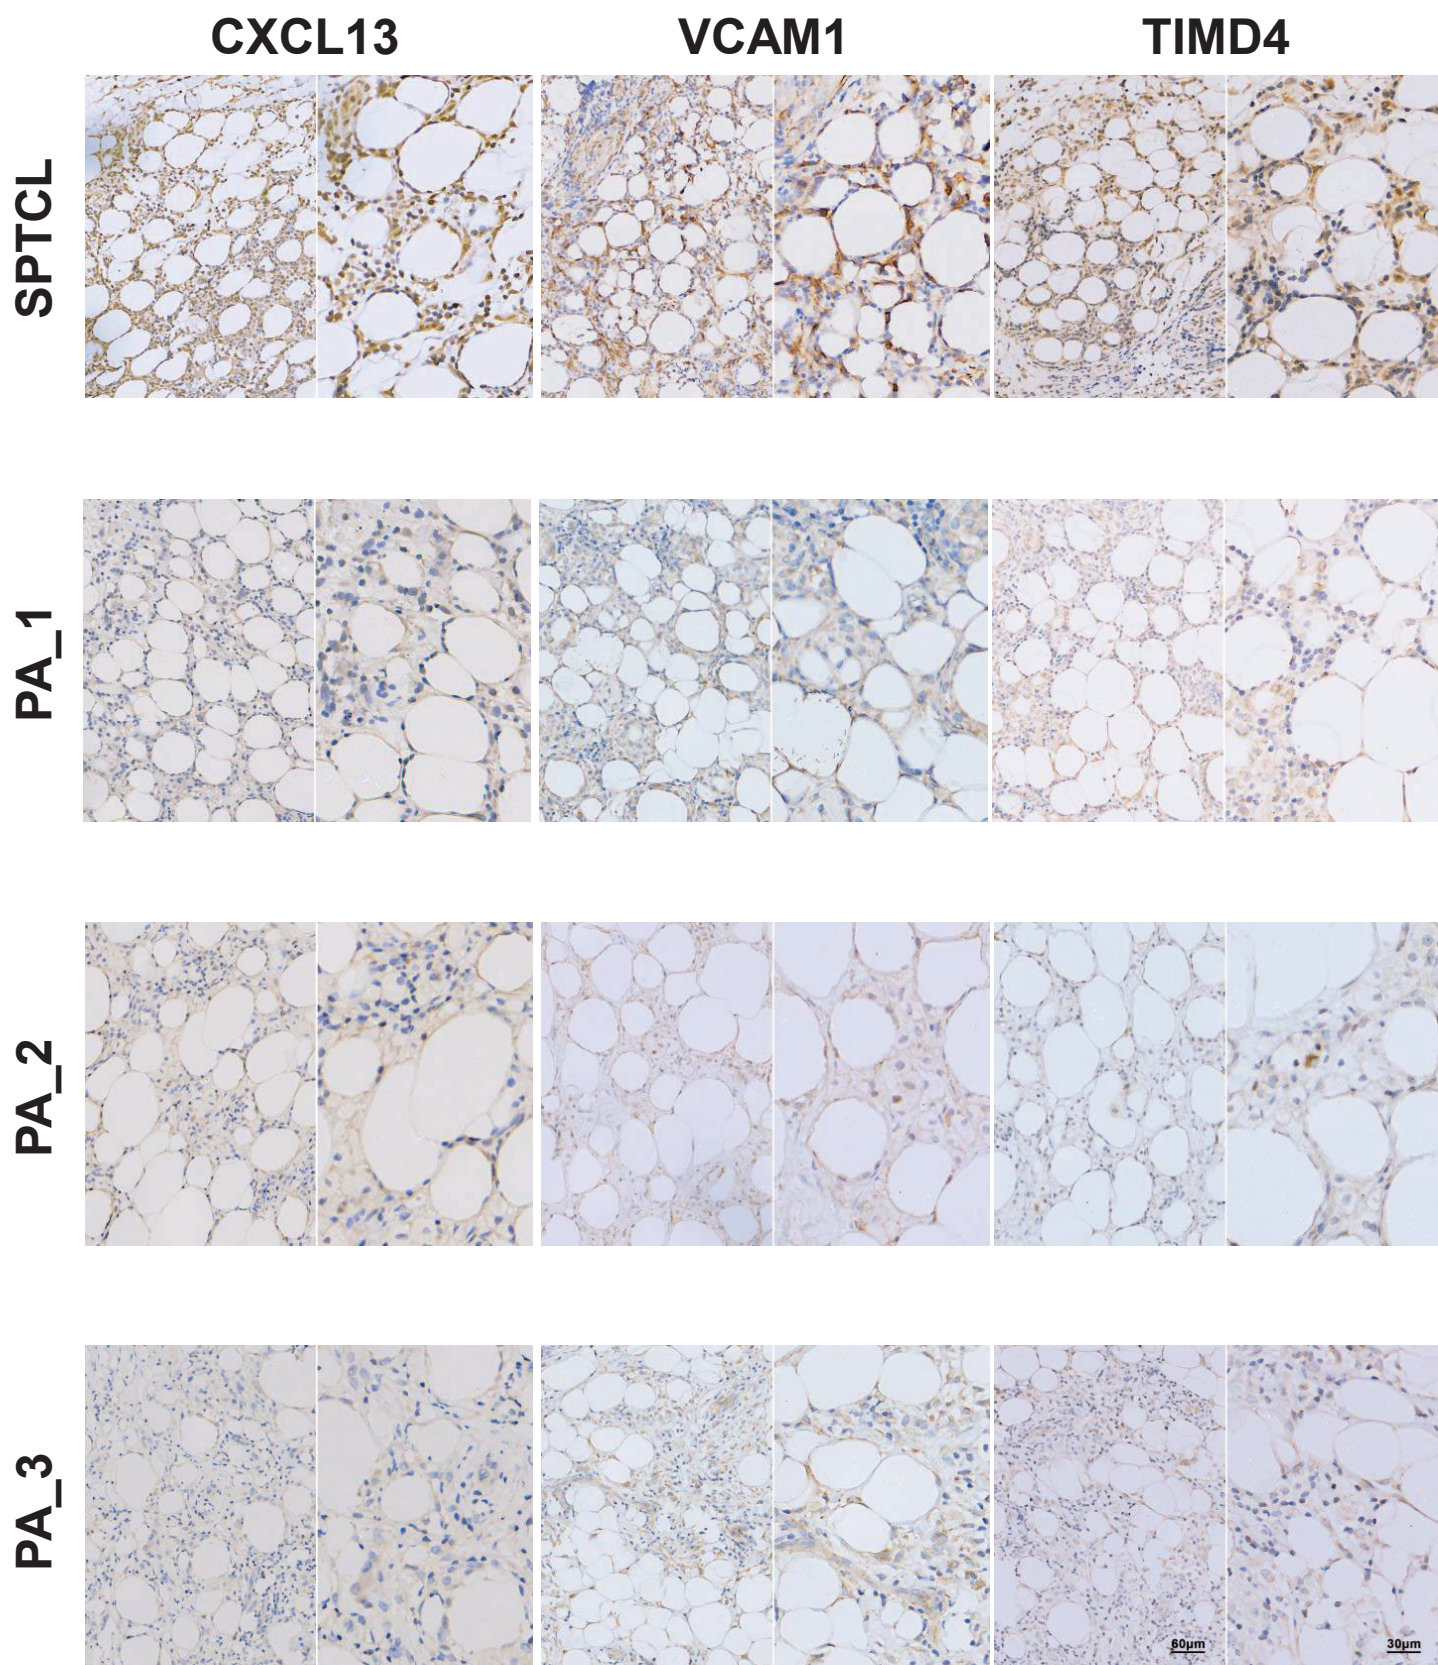

**Supplemental Figure S12. Verification results of three novel markers (VCAM1, CXCL13, TIMD4).** (A) Immunohistochemical stain from subcutaneous lesion biopsies of Subcutaneous panniculitic-like T-cell lymphoma (SPTCL, n=1), and panniculitis (PA, n=3), each at 20x (left) and 40x (right).
