# Supplementary material for: Single-Cell RNA-seq Reveals Characteristics of Malignant Cells and Immune Microenvironment in Subcutaneous Panniculitis-Like T-Cell Lymphoma
Source: Front Oncol. 2021 Mar 18;11:611580. doi: 10.3389/fonc.2021.611580 (PMC8013729; doi:10.3389/fonc.2021.611580)
Supplement: Supplementary file 2 [file Table_1.xlsx]

## Sheet: Supplementaltable1
	Supplementary Table S1. Ranking of top 100 most associated genes in each GEP
	Int.Fibro_3	Int.SPTCL	Int.Macro_5	Int.Mast	Int.Endo_2	Int.Macro_1	Int.Epi_1	Int.DC	Int.B	Proliferation	Mus.contraction	Int.Macro_4	Int.Epi_2	Int.Endo_1	Int.T_1	Int.NK	Act.Macro	Int.Fibro_2	Int.Macro_3	Int.Macro_2	Act.T	Int.Fibro_1	Int.T_2
1	MFAP5	CCL5	APOC1	CPA3	CCL21	FSCN1	CLDN3	TSPAN13	JCHAIN	UBE2C	NDUFA4L2	IFIT1	S100A14	CLEC14A	IL7R	CTSW	IER3	TNC	G0S2	HLA-DPA1	TNFRSF9	LUM	TNFRSF4
2	RARRES1	GZMA	APOE	SLC18A2	TFF3	MARCKSL1	KRT19	PPP1R14B	MZB1	H2AFZ	COX4I2	IFIT3	COL17A1	A2M	PPP2R5C	AREG	NFKBIA	COL5A2	C15orf48	HLA-DPB1	FABP5	CTSK	FOXP3
3	IGFBP5	NKG7	FTL	TPSG1	MGP	CCL19	SOX9	TCF4	IGKC	STMN1	AVPR1A	RSAD2	DSP	ADGRL4	SARAF	KLRD1	GADD45B	COL5A1	FBP1	HLA-DRB5	CRTAM	RARRES2	PPM1N
4	PLAC9	GZMH	GPNMB	TPSB2	CLDN5	EBI3	CALML5	PLD4	IGLC2	TOP2A	PDE1A	TNFSF10	KRT14	VWA1	SMCHD1	KLRF1	IL1B	SPARC	SNX10	CST3	ZBED2	C1S	ICOS
5	SOD3	CST7	CTSD	MS4A2	LYVE1	BASP1	AQP5	SEC61B	IGHM	TUBA1B	OR51E1	APOBEC3A	DSC3	VWF	CD3G	CD7	DUSP1	COL1A1	CD14	HLA-DRA	GZMB	COL6A1	CTLA4
6	SERPINE2	GZMK	CTSB	HPGD	SEMA3A	LAD1	GGT6	CLEC4C	IGLC3	NUSAP1	TEX41	IL1RN	KRT5	PLVAP	SPOCK2	IL2RB	TNF	TAGLN	NINJ1	HLA-DRB1	CCL4	COL6A3	GNG8
7	PI16	TIMD4	LGMN	TPSAB1	TFPI	LAMP3	LINC01235	LILRA4	IGHG1	TUBB	ECEL1	ISG15	SFN	CD34	LEF1	CMC1	ZFP36	LMCD1	INHBA	C1QB	GNG4	COL6A2	CORO1B
8	CLU	LAG3	LGALS3	HPGDS	PROX1	CCR7	EHF	SMPD3	TNFRSF17	HIST1H4C	HSD11B2	WARS	CCL27	HSPG2	ZFP36L2	XCL1	IER2	CTHRC1	CCL2	TMSB10	CCL3	DCN	IL2RA
9	PLA2G2A	PRF1	TREM2	CDK15	TM4SF1	GPR157	KRT7	BCL11A	SSR4	CDKN3	HIGD1B	IFIT2	AC005165.1	SPARCL1	GPR155	HOPX	ATF3	SULF1	CTSL	AIF1	IFNG	PRRX1	CXCL13
10	IGFBP6	CD27	CTSZ	CMA1	PCDH17	SLCO5A1	FAM189A2	GPR183	SEC11C	HMGB2	ABCC9	FCN1	LGALS7B	RAMP3	TRAT1	XCL2	FOS	RCN3	FTH1	HLA-DQA1	HSP90AB1	MXRA8	S100A4
11	PTGIS	GNLY	CD68	HBD	ITIH3	PPA1	DANT2	PLAC8	IGHA1	PCLAF	BANCR	MX1	PCDHB14	APLNR	GIMAP7	IFITM2	CXCL2	COL1A2	AQP9	C1QA	PKM	FBLN1	AC133644.2
12	MGST1	CD3D	GCHFR	RHEX	LINC01197	CSF2RA	PDE1C	IL3RA	IGHG4	TYMS	EDNRA	CXCL11	KRT6A	COL15A1	KLF2	MATK	JUNB	SERPINH1	CLEC4E	HLA-DQB1	CXCL13	C1R	BATF
13	ACKR3	PTMS	VSIG4	TPSD1	MMRN1	TXN	FXYD3	UGCG	AC012236.1	CDK1	LINGO1	CXCL10	RHBDL2	RAMP2	TRAC	TNFRSF18	SOCS3	COL3A1	CCL8	C1QC	GAPDH	MMP2	LINC01943
14	CXCL14	S100A4	CTSC	KCNH2	ECSCR	BIRC3	TFCP2L1	IRF8	IGHG3	BIRC5	SPRN	NAMPT	KRT15	PODXL	CD3E	KLRC1	BCL2A1	CTGF	PLAUR	CD74	TNIP3	S100A13	IL32
15	NTRK2	VCAM1	ASAH1	MS4A3	PAEP	ACHE	STAC2	SPIB	IGLL5	CKS1B	KCNJ8	DDX58	BNC1	ROBO4	GZMM	TRDC	CCL3L1	LOX	PTAFR	C1orf162	PGAM1	PDGFRB	TNFRSF18
16	FBN1	LYST	ACP5	CTSE	NTS	TUBB2B	FOLH1	CCDC50	PKHD1L1	HMMR	FAM162B	S100A9	ZNRF3	ESAM	LEPROTL1	GNLY	PPP1R15A	WNT2	SOD2	TYROBP	MIR155HG	HTRA1	SPOCK2
17	TIMP1	TIGIT	CSTB	HDC	FLT4	TVP23A	ESRRG	TCL1A	DERL3	CENPF	FOXS1	MNDA	TRIM29	MMRN2	SYNE2	NCAM1	FOSB	PDPN	LILRB4	FGL2	RGCC	OLFML3	CD28
18	ADGRD1	CXCR6	CAPG	GATA2	SPOCD1	LOR	PART1	ITM2C	XBP1	DLGAP5	NOTCH3	GCH1	ADGRL3	ENG	STK4	SRGAP3	JUN	COL12A1	DRAM1	PSME2	CDK6	CALD1	FANK1
19	ABI3BP	SH2D1A	NPL	IL13	MYCT1	HMSD	MESTIT1	SPCS1	IGHG2	MKI67	TBX2	FPR1	ALDH3A1	KDR	LYAR	MAFF	EGR1	MMP1	GLUL	LST1	CCL4L2	EGFL6	TIGIT
20	MT1M	CADM1	CTSL	CTSG	CAVIN2	LIMCH1	WFDC2	ALOX5AP	FKBP11	CENPW	SPARCL1	LILRA5	DSG3	ARHGEF15	GYPC	BTG1	NFKBIZ	MYL9	SLC11A1	MS4A6A	CCL1	CDH11	PTGIR
21	THY1	PHLDA1	C1QA	AC007879.3	UNC5A	ANKRD33B	SLC4A11	RNASE6	IGLV1-44	ASPM	RGS5	SAT1	HES2	COL4A1	RIPOR2	SH2D1B	KLF6	CYR61	FCER1G	PRDX1	MYOD1	PCOLCE	TRAC
22	OSR1	IL32	C1QC	CADPS	NFIA-AS2	CCL22	SCGB2A2	CYB561A3	POU2AF1	RRM2	AC109479.1	MX2	LYPD6B	IGFBP7	AES	PTGDR	AC007952.4	BGN	CEBPB	VAMP5	FAM3C	TPM2	LAYN
23	TNXB	APOBEC3G	PLD3	KIT	MYZAP	CD83	SFRP1	LAMP5	SCNN1B	UBE2T	AL590999.1	TNFSF13B	RAB25	MECOM	EPB41	TSC22D3	NAMPT	FN1	FCGR3A	POMP	SHC4	AEBP1	F5
24	ELN	DUSP5	PSAP	AC115522.1	GPR143	MAP3K13	NAALADL2	IRF7	IGLV2-14	TPX2	NPNT	GBP1	PCLO	PTPRB	PIK3R1	CD300A	KLF4	SELENOM	CCL7	HLA-DMA	NPM1	PPIC	LAIR2
25	SEMA3C	HCST	CD63	AC009226.1	HYAL2	RASSF4	CELF5	TRAF4	LINC00582	CENPA	EPHA3	S100A8	PERP	CDH5	TCF7	B3GNT7	NR4A1	TPM1	C3AR1	ACTB	NMB	CXCL12	DIRAS3
26	PDPN	AFAP1L2	GRN	AC027237.3	CALCRL	AOC1	PPARGC1A	SMIM5	IGHV3-33	TUBB4B	COL18A1	ANXA2R	AC068768.1	EMCN	PASK	DUSP2	NLRP3	AC136628.4	IL1R2	FCGR1A	PARK7	FBLN2	LINC02099
27	S100A6	CYTOR	SCPEP1	CNRIP1	BCHE	DAPP1	NECTIN4	MAP1A	HSP90B1	CDCA3	AC007406.3	SSB	S100A2	ECSCR	CD3D	CAPN12	TNFAIP3	TNFRSF12A	PLA2G7	S100A11	NME1	COL3A1	AC017002.3
28	FSTL1	CD2	PRDX1	SHCBP1L	GNG11	NCCRP1	MIA	HERPUD1	IGKV3-20	AURKB	GUCY1A2	S100A12	KRT1	ADGRF5	CAMK4	KRT81	ARL5B	MT1E	CALHM6	PYCARD	SRRT	FMO1	RTKN2
29	DPT	LINC01871	GM2A	LTC4S	VLDLR	TMSB10	EPCAM	ZFAT	IGHGP	SPC25	LYPD1	GK	PTPRZ1	SOX18	N4BP2L2	IER2	PLEK	GREM1	ANKRD22	CLEC10A	TNFRSF1B	MDK	DLGAP1
30	NNMT	LAIR2	NUPR1	IL1RL1	LCN1	NUB1	MLPH	SCT	CD79A	PBK	TFPI	DUSP6	LAMC2	MCAM	PTPRC	JUND	SOD2	MT2A	GSTO1	TYMP	TIGIT	COL1A2	TBC1D4
31	FGF7	PRDM1	LIPA	KEL	SMAD1	TNFAIP2	DCD	DNASE1L3	IGHV3-23	HMGB1	PDE3A	IL27	CAPNS2	PALMD	TMSB4X	REL	CD83	THBS1	CD163	TUBA1B	PDLIM4	COL4A2	TNFRSF25
32	MT2A	HAVCR2	RAB42	LINC01918	GJA1	TREML1	SORBS2	SERPINF1	PRDX4	CCNB1	ENPEP	LYZ	FGFR2	SEMA3F	PDE3B	ZFP36L2	ICAM1	TNFAIP6	CEMIP	C1orf54	NDFIP2	AC136628.4	CD177
33	IGFBP4	RUNX3	KCNMA1	TTLL7	C2CD4B	GCGR	ZNF860	PTCRA	SLC2A5	ZWINT	MYL9	PLEK	KRBOX1	RAPGEF4	CD52	HCST	CCL3	FKBP10	FPR3	PAK1	ARL3	SELENOM	MAF
34	CFD	CSF1	TSPAN4	SLC45A3	ARHGAP29	NET1	KRT15	MYBL2	TNFRSF13B	HMGN2	DKK3	HES4	TP63	TM4SF18	FAU	KRT86	AC245014.3	STEAP1	PLAU	GLRX	RANBP1	ISLR	MYL6
35	HSD11B1	RASD1	FCGRT	GATA1	RHOJ	PRAME	PTCHD1	IDH3A	IGLV6-57	CCNB2	ADCYAP1R1	ISG20	VSNL1	AQP1	ODF2L	FXYD5	NR4A2	UCHL1	DEFB1	IFI30	CD70	SERPING1	ARG2
36	LINC01133	TRGC2	C1QB	SPACA3	F2RL3	GPX4	KIAA1549	DERL3	IGHV5-10-1	PTTG1	COL5A3	H3F3B	SFRP1	ADAMTS9	TPT1	SPTSSB	EREG	XIRP1	CD274	LAP3	RAN	CFH	IGFL2
37	HTRA3	SIRPG	ATP6V1F	LMO4	SEMA6A	FLT3	SERTAD4	SLC15A4	IGHA2	GTSE1	IGFBP7	DEFB1	CXCL14	SYNPO	PIK3IP1	SPINK2	CXCL3	FDCSP	C5AR1	SPI1	TBC1D4	BICC1	COX5A
38	FST	TRBC2	OTOA	SVOPL	SNCG	TUBA1C	STXBP6	PLEKHD1	AC004130.1	HIST1H1B	THY1	RETN	KRT17	FLT1	CLEC2D	TNFAIP3	DUSP2	TDO2	LINC01094	VAMP8	BATF	MFAP2	ICA1
39	PRRX2	KLRC1	NR1H3	AC011444.2	AC093909.4	BCL2L14	NFIB	CD4	IGLV3-19	NCAPG	COL4A1	SERPINB9	AMOTL1	ARHGAP29	EEF1A1	CD44	PDE4B	NNMT	CD300E	TUBA1A	BIRC3	MFAP4	PGM2L1
40	MT1E	GZMB	CHI3L1	TMEM246	RAMP2	NRXN2	WNK2	IRF4	IGLV1-40	CENPE	REM1	SOCS1	PKP3	SLC9A3R2	STK17A	SYTL3	SLC2A3	ADAMTS2	SDCBP	PRELID1	XCL2	ADAMTS2	HLF
41	PRSS23	RARRES3	PLA2G7	LRP4-AS1	EGFL7	IDO1	VPS37D	GAS6	EAF2	UBE2S	EBF2	IFIH1	PTPN3	PREX2	HLA-E	ITGAX	BTG2	MMP2	CTSB	IGSF6	UBE2F	CPXM1	ACTG2
42	PLA2G5	RAB27A	CTSS	STXBP6	IGF1	CD80	KRT18	FAM129C	IGHV4-59	CCNA2	PITX3	APOBEC3B	ITGB4	FAM167B	ATM	TXK	CDKN1A	SLC39A14	S100A11	LGALS2	CD82	CTHRC1	GAPDH
43	CCDC80	CD3G	BLVRB	AKAP12	AFAP1L1	ARHGAP22	CGNL1	GAPT	FCRL5	MND1	MYLK	HERC5	SLC25A48	PCDH17	STAT1	TPT1	PLAUR	COL16A1	PILRA	CD33	PIM3	SSPN	DNPH1
44	NGF	CD3E	ATP6V0B	AC109597.2	GPR182	CRLF2	ANXA3	SCAMP5	IGHV3-48	CKS2	TRPC6	SECTM1	RAB17	SHE	SLFN5	ADGRE5	PTGS2	ALPL	TREM1	IFI27	ZBTB32	IGFBP4	CARD16
45	SRPX	IFI27L2	CREG1	SOCS2	COL22A1	SYNPO2	ELF3	TXN	CCR10	DUT	ADGRF5	SAMD4A	FBLL1	SHANK3	EEF1D	CATSPER1	SGK1	CREB3L1	MS4A4A	FCER1G	GEM	MMP11	SOD1
46	EFEMP1	IKZF3	NOP10	MLPH	PPFIBP1	NABP1	AARD	PTGDS	IGHV1-18	TK1	GJA4	ACSL1	BNIPL	CALCRL	SF1	SAMD3	ATP2B1-AS1	LXN	ACP2	TMEM176B	TNFRSF18	CLMP	PTPRR
47	PTGES	CD8A	BRI3	LIF	PGM5	GSN	PRSS22	SLC35F3	IGHV3-30	KIF2C	KCNS3	HESX1	AC079834.2	BCAM	RIC3	NCR1	CHMP1B	LGALS1	IDO1	CYBA	ID3	TUSC3	RORA
48	ABCA8	SIT1	TIMP2	SLC24A3	TNFAIP8L3	CLIC2	TDRP	CIB2	IGHV5-51	MAD2L1	B3GALT1	CASP1	CDH1	JCAD	PABPC1	AL157895.1	CXCL8	DCN	SLC43A2	LY86	LINC01281	RND3	LINC01727
49	SCARA3	GAPDH	LINC01914	SSUH2	PCAT19	CFLAR	MARCH1	CCDC88A	IGKV1-39	CEP55	CYGB	CFP	DMKN	MYCT1	CXCR4	KIR2DL4	KDM6B	MMP3	SIRPA	PLEKHO1	HSPE1	COL1A1	ZG16B
50	TWIST2	CBLB	NPC2	HRH4	NRP2	GSTP1	SCGB3A1	SELENOS	IGLV2-23	NUF2	C11orf96	ATF5	CCDC74B	FZD4	DGKA	KLRB1	CCRL2	KDELR3	CXCL8	CPVL	C1QBP	CDC42EP5	PRDX2
51	S100A16	DTHD1	DNASE2	AL136018.1	EFNA5	INSM1	MPZL2	CLIC3	IGLV2-11	DEPDC1	WFDC1	BAZ1A	CXADR	PCDH12	BCL11B	FAU	CD69	VCAN	BRI3	SCIMP	NPW	LAMB1	OSBPL6
52	CAV1	NDFIP2	PKD2L1	AL157895.1	MRC1	SYNGR2	DEPTOR	FCHSD2	IGHV3-53	CDC20	CALD1	NLRP3	IRX5	AL583785.1	FCMR	AHI1	HBEGF	MT1M	DMXL2	TPMT	NDUFV2	EFEMP2	AL359834.1
53	C1R	CORO1A	CD81	GCSAML	SOX18	TNNT2	SLPI	COBLL1	IGHV1-46	HMGB3	COL4A2	DYNLT1	THAP10	TSPAN12	SAMD9	SEPTIN7	AC015912.3	GPX8	NECTIN2	CTSH	HSPD1	PDGFRA	ZC3H12D
54	GPC3	KLRG1	MPP1	KDM4A-AS1	PIEZO2	CD86	AC092171.4	WDFY4	IGKV2-30	KIF23	TPPP3	EPSTI1	ANO1	NOSTRIN	LIMD2	MPG	IL6	CAVIN3	FCGR2A	SMCO4	EGR2	LGALS1	CALM3
55	LOX	LINC01943	SULT1C2	COL22A1	EDNRB	RASGRF1	CD24	MEF2C	IGHV3-11	KIF11	C11orf91	KCTD12	AL732292.2	CYYR1	LCK	DDIT4	HCAR2	CALU	PDCD1LG2	LMO2	RPA3	TWIST2	FOXA3
56	C3	ETS1	HSD17B14	DDR1-DT	CXorf36	EBF4	BARX2	EGLN3	LINC01485	ANLN	LHFPL6	HPSE	PTPRF	EFNB2	XAF1	RAC2	TAGAP	CRABP2	IL4I1	AKR1A1	LAG3	PTN	CD2
57	LRRN4CL	RNF19A	ALDH1A1	ENPP3	PCDH12	NRP2	CRNDE	HIGD1A	CPNE5	TTK	PRSS23	GBP4	SH2D4A	CFI	IFI44L	CLEC2B	PPP1R15B	MIR503HG	OLR1	HLA-DMB	PHLDA1	LTBP2	SATB1
58	MEDAG	SRP14	C2	LINC01140	TEKT2	TSPAN33	SERTAD4-AS1	RNASET2	IGLC6	SGO2	COLEC11	LILRB2	F12	FAM110D	CDC14A	FXYD7	EGR2	ENAH	CXCL16	ANKRD22	DUSP4	VIM	JPT1
59	PGF	SH3BGRL3	MS4A4A	PLAT	RELN	KIAA1211	TBX3	APP	TXNDC5	PLK1	NR2F2	NCF1	C2orf40	PECAM1	RNF213	STK17A	NEAT1	CERCAM	LRP12	PDIA3	CYTOR	EMILIN1	GMFG
60	ANGPTL4	LSP1	TMEM37	VWA5A	EFEMP1	LSP1	TNNC2	MPEG1	IGLC7	MXD3	LURAP1L	MARCKS	FBXO27	TEK	GCC2	MAP3K8	NR4A3	BMP1	LHFPL2	RAC1	PLS3	LAPTM4A	HINT1
61	PDGFRA	ATP5IF1	HNMT	AL031429.1	STC1	SLC22A23	RAVER2	EPHB1	IGHV1-3	KPNA2	MYO1B	DSE	NFIA	SELE	TRIM22	ADGRG3	TRIB1	ADAM12	KYNU	RNH1	TIE1	GPM6B	MIR4435-2HG
62	NT5E	TENT5C	RRAGD	TAL1	FILIP1	HLA-DOB	IL12A	NME8	DUSP26	CDCA8	PEAR1	MIR3945HG	SOX15	TGM2	PNISR	ID2	OLR1	CNN1	ANXA5	YWHAH	SNRPD1	FNDC1	YWHAB
63	S100A10	PYHIN1	SMPDL3A	UTS2	SP6	TSPAN15	SPINT1-AS1	LDLRAD4	IGKV4-1	CKAP2L	ITGA1	TREM1	IRX6	ERG	CYTIP	TCF7	CCL4L2	COPZ2	MS4A7	RAB32	TPI1	BGN	RGS10
64	LOXL1	ENTPD1	CTSA	OR2B6	TBX1	SERPINB10	CMTM4	VEGFB	IGKV3-15	KIFC1	SLC7A2	CD300E	SMOC2	GNG11	IFNG-AS1	AC020916.1	SAT1	ITGA11	CCL18	CALHM6	LINC01033	TPBG	NMB
65	CBR3	PDCD1	MMP12	ATP10D	MTUS1	KCNN1	CACHD1	HSP90B1	IGLV1-47	AURKA	IL17B	HSPA1A	EMP2	CRIP2	PRMT2	TNFSF14	PNRC1	THY1	CD44	SLAMF8	BHLHE40-AS1	HMCN1	INSM1
66	FBLN1	FASLG	CD9	KRT1	WFS1	NAV1	AC093827.5	RAB11FIP1	AC021074.3	H2AFX	MEST	CCR1	POU3F1	CXorf36	DNAJB1	GPR65	CSRNP1	CA12	ARNT2	TMEM176A	C16orf45	MME	CACNB2
67	STEAP1	SERPINB1	ATOX1	CLC	SELENOP	CCL17	KAZN	SMC6	AC233755.2	HJURP	NID2	ACOD1	SERTAD4	BCL6B	TSC22D3	EEF1A1	KLF10	TPM2	CTSC	FCGR1B	RGS16	POSTN	CXCR6
68	MDK	ZBTB38	LY96	PTGER3	RAPGEF5	RAB9A	PPL	AC119428.2	IGKV1D-8	CDCA2	AC140912.1	PARP14	PDLIM3	SLCO2A1	FAM118A	PPP1R9A	TNFAIP2	MXRA5	RALA	UCP2	SQLE	CD248	CD79B
69	LURAP1L	C12orf75	RNF130	PPM1H	TIMP1	NPFFR1	PTPRK	SLC20A1	LINC02362	KNL1	NFASC	CKAP4	AJUBA	GIPC2	OXNAD1	CLDND1	VEGFA	PXDN	SMIM25	CSF1R	FASLG	FRMD6	TNFRSF1B
70	CXCL12	TSPAN2	ACP2	TMEM150C	INKA2	ENTHD1	KLF5	C12orf75	MYDGF	RAN	CCDC102B	LMO2	NTRK2	AFAP1L1	NUCB2	METRNL	S100A9	FSTL1	FNIP2	OAZ1	RAMP1	ECM1	SMS
71	ANXA2	AC243829.4	SCARB2	IL4	PDLIM3	CD200	NTN4	PMEPA1	IGHV3-15	TUBA1C	GJC1	LYN	PHYHD1	THSD7A	TRGC2	LINC00996	CSTA	PCOLCE	KLHDC8B	SERPINA1	CDC20	ABCA6	ZNRF1
72	GPRC5B	EID1	MGLL	EXD3	SCN3B	SAMSN1	TMEM47	PACSIN1	IGLV3-1	CDCA5	RERG	SERPINB1	EFNA3	STC2	AQP3	LINC01871	C5AR1	IL33	CAPG	CALR	PAICS	LTBP1	FRRS1L
73	LIMA1	LCK	HEXA	NT5DC2	BCL6B	ANXA3	NPAS2	CUX2	AL133467.1	HIST1H1D	MCAM	RIN2	KLF5	NOVA2	ANKRD12	SLC39A10	RIPK2	ADAMTS4	S100A10	MNDA	MAP2K3	LINC01116	ARHGDIB
74	ARHGAP29	ITGA1	CYP27A1	SAMSN1	RGS16	C6orf223	PLA2R1	TMEM8B	IGKV1-9	SMC4	EGFLAM	LACTB	EPHB3	DLL4	TMEM123	JAK1	CCL20	CRISPLD2	CTSH	IFNGR2	RAB27A	PRRX2	NDUFV2
75	AC245595.1	AL158071.4	MGST3	MAOB	LRRC38	TUBB6	CITED4	ZBTB18	IGHV3-74	SHCBP1	LPL	GNB4	CTNND2	SPNS2	SH3YL1	CD69	IL1A	PPIC	GPR84	IFITM3	ATP9A	LGALS3BP	LINC02195
76	IFI6	PFN1	HEXB	DUOXA2	TMEM255B	IL12B	PTGES	RUBCNL	IGHV3-7	JPT1	SPARC	SCIMP	FXYD3	MEOX1	RCAN3	GFOD1	STX11	MDK	SRGN	PPA1	SNRPB	TWIST1	ATP5IF1
77	AOX1	LINC02195	MYDGF	DLC1	PXDN	GNG5	RNF208	JAML	IGHV6-1	PTMA	CAV1	GCA	IL34	EGFL7	GPR171	TSTD1	AC016831.1	KDELR2	SLC39A8	CD72	SNX9	DNM3OS	AC034229.4
78	ASS1	JAKMIP1	ATP6V0E1	CSF2RB	CFI	CDKN1A	SNORC	NEK8	IGHV3-21	H2AFV	PDGFRB	RGL1	OLFM2	CX3CL1	EVL	ARAP2	MCL1	CNN3	RAB20	CASP1	SERPINB1	DPT	HTATIP2
79	LTBP1	DAPK2	ADAMDEC1	HIST1H1B	SLC6A17	ALPK2	TLE2	LRRC26	IGHV7-4-1	MELK	PABPC5	DDX60L	CYP1B1	RAB3C	OCIAD2	SELL	LUCAT1	LRRC17	CYSTM1	EFHD2	TSPAN2	PPFIBP1	DUSP16
80	EGFR	SUB1	FCER1G	PIMREG	PDE1A	CXCL9	OBSL1	PHEX	IGLV2-8	FOXM1	FILIP1L	ADGRE2	AC008771.1	TM4SF1	NCK2	SLFN5	ZNF331	P3H3	FNDC3B	ARPC3	MTSS1	LRP1	PFN1
81	HMCN2	EOMES	SCD	FAM19A2	IGFBP7	UBD	TBC1D30	DRD4	IGHV3-64D	DTYMK	ID4	GBP5	PLEK2	HYAL2	NSD3	ARHGAP9	RGS2	PDLIM7	SLC7A7	NPC2	IQCG	TMEM158	SNX9
82	WNT4	LAT	TCN2	LYL1	RBP1	SPIC	CDS1	TNFRSF21	IGLV3-27	KIF15	EPS8	FPR2	DST	COL4A2	EIF4A2	KMT2E	HCAR3	CALD1	CD80	FCGRT	TIMM8A	NNMT	SLC1A1
83	ISLR	CKLF	SLCO2B1	KLHDC7B	ID1	RAB10	USP54	P2RY6	SMPDL3B	ESCO2	COX7A1	P2RY13	SMO	CXXC4	AP3M2	FOS	ATP1B3	RAI14	CREG1	SUCNR1	ATP5MC3	ANGPTL2	GALM
84	MME	CD99	AKR1A1	AP000238.1	CD163L1	WNT5B	BCAR1	EPHA2	FCRL2	HIST1H3B	AC046168.2	SLC31A2	PALMD	RBP7	ARHGDIB	SEPTIN11	GPR84	CKAP4	MPP1	ATOX1	TIMD4	RAB13	KIAA0319L
85	CAVIN3	MCTP2	PLTP	DUOX2	HAND1	TUBB2A	PTPRF	CBFA2T3	IGKV1-5	NDC80	PLPPR4	VAMP5	CTNNAL1	CAV1	TRBC1	SH2D2A	CYB5D1	DPYSL3	PNRC1	RGS10	TNS3	CNN3	TNFRSF8
86	ADAMTS5	ATXN1	KLHDC8B	CCR3	FAM189A2	ZNF366	PERP	AC011893.1	IGHV4-39	CENPN	TCIM	GLUL	CELSR2	TSPAN7	IKZF1	NR4A1	EIF1	DACT1	CD40	LPCAT2	SOD1	ANTXR1	ADTRP
87	RND3	DUSP2	MSR1	RAB44	ADAMTS7	TRAF1	IRX2	RGS2	IGHV3-43	BUB1B	MAP2	RNF19B	VWCE	FAM107A	IL32	PARP8	AP1S2	PDGFRA	BCL2A1	CLEC7A	CD72	CHN1	GADD45A
88	OSMR	TRBC1	RMDN3	HS6ST1	AC013271.1	LGALS2	KIAA1522	ST6GALNAC4	FAM30A	CCDC34	UACA	OASL	NUDT12	CDH13	DDX5	TMIGD2	YBX3	FRMD6	FMNL2	MARCH1	ENO1	MRC2	TESC
89	LIPG	ADGRG1	APOC2	AL138960.1	ADIRF	TBC1D4	CADM4	LTB	KLHL14	CENPU	CD163L1	SLC25A37	FNDC10	MEOX2	CDKN1B	PIK3R1	IRF1	RCN1	LAIR1	ALDH2	CADM1	BEX3	PVALB
90	LRP1	VPS37B	HTRA4	GRAP2	TIE1	PTPN1	OCLN	PTPRS	IGHV1-69D	PCNA	TSPAN15	THEMIS2	ASAP2	ACKR1	CDC42SE2	RNF125	THAP2	C3orf67-AS1	OSCAR	TGFBI	EEF1E1	THBS2	PKM
91	GFPT2	GMFG	TMEM251	BMP2K	LINC00636	AFDN	USP27X	BCL7A	SSR3	SGO1	SLC22A3	NECTIN2	TINCR	GJA4	TNRC6B	LGALS9B	AC007032.1	CAVIN1	ADAMDEC1	ANXA2	CD8A	COLEC12	POU2F2
92	PMP22	FAM3C	HAMP	AC111000.4	TEK	NEURL3	PTPN20	GRASP	MYL2	TROAP	SFTA1P	FCGR2A	SEMA3F	CD93	NOP53	EVL	AC090527.3	PRDX4	ABCA1	PSMA4	BTG3	DDR2	TSHR
93	TMEM54	BHLHE40-AS1	VAT1	CDCA3	PLA1A	RUFY3	KRT8	SCN9A	SAMD7	PPIA	CXCL9	IFI16	ZNF462	SMAD9	ZNF683	PLCB1	JUND	COL27A1	ATOX1	LRRC25	SIT1	PCDH18	MAGEH1
94	LRIG3	CD52	DNASE2B	HIST1H2BJ	FOXC2	ALDH2	AL512306.2	TLR7	IGLV3-25	E2F8	ANO4	PLSCR1	NFIB	EXOC3L2	EZR	ABHD2	PIM3	CH25H	CLEC4D	RARRES3	REL	RUNX1T1	ARID5B
95	GOLM1	LCP1	CPM	C1orf226	LAMA4	CD40	LRP5	GNG7	IGHV2-70	RAD51AP1	IBSP	CSTA	PCDH7	EPAS1	PPM1K	AC025164.1	AC073352.2	PYCR1	HBEGF	PLBD1	PFDN2	FAM20A	TTC39C
96	RAET1G	SNAP47	L3MBTL4-AS1	FCGR2B	NR2F2	SYNPO	AL590560.2	CD74	IGHV3-49	CLSPN	NID1	TOP1	BCAM	INSR	FAM102A	MMP25-AS1	NAF1	COL8A1	GRB2	CHCHD10	GYS2	CYP7B1	SPATS2L
97	ALDH1A3	ID2	CXCL16	BTK	GALNT18	BCL2A1	ZNF585A	PROC	LMAN1	KIF4A	PAMR1	DNAJA1	MBIP	SNCG	MAL	CHST12	CEBPD	S100A16	CMKLR1	NAGK	EOMES	GLT8D2	HACD1
98	LVRN	DGKH	LAPTM5	AC126696.3	MDFI	PTGIR	MCF2L	SLC12A3	IGLV7-46	ASF1B	TBX2-AS1	CCL8	ZNF471	ITIH5	GIMAP1	CD2	PHACTR1	CSRP2	LILRB3	PILRA	AC007388.1	PTK7	MARCH3
99	CAVIN1	TMSB4X	FABP3	BACE2	ARHGEF15	MYL6	LRP11	FADS1	ITM2C	PIMREG	AC090409.1	NEXN	SOWAHC	TIE1	ACAP1	TNFSF9	CLEC7A	STEAP2	LAMB3	SHTN1	AC114550.1	SERPINF1	AICDA
100	NOVA1	DOK2	HLA-DMA	UBD	SCN3A	TMEM176A	SAMD12	ASIP	RAB30	PKMYT1	ANO1	FGL2	KBTBD6	HECW2	BTG1	SPAG1	FCN1	TMEM158	CSTB	ARPC1B	ZC3H12C	NT5E	CADM1

## Sheet: Sheet1
Supplementary Table S1. Ranking of top 100 most associated genes in each GEP
Int.Mast
CPA3	SLC18A2	TPSG1	TPSB2	MS4A2	HPGD	TPSAB1	HPGDS	CDK15	CMA1
HBD	RHEX	TPSD1	KCNH2	MS4A3	CTSE	HDC	GATA2	IL13	CTSG
AC007879.3	CADPS	KIT	AC115522.1	AC009226.1	AC027237.3	CNRIP1	SHCBP1L	LTC4S	IL1RL1
KEL	LINC01918	TTLL7	SLC45A3	GATA1	SPACA3	LMO4	SVOPL	AC011444.2	TMEM246
LRP4-AS1	STXBP6	AKAP12	AC109597.2	SOCS2	MLPH	LIF	SLC24A3	SSUH2	HRH4
AL136018.1	AL157895.1	GCSAML	KDM4A-AS1	COL22A1	DDR1-DT	ENPP3	LINC01140	PLAT	VWA5A
AL031429.1	TAL1	UTS2	OR2B6	ATP10D	KRT1	CLC	PTGER3	PPM1H	TMEM150C
IL4	EXD3	NT5DC2	SAMSN1	MAOB	DUOXA2	DLC1	CSF2RB	HIST1H1B	PIMREG
FAM19A2	LYL1	KLHDC7B	AP000238.1	DUOX2	CCR3	RAB44	HS6ST1	AL138960.1	GRAP2
BMP2K	AC111000.4	CDCA3	HIST1H2BJ	C1orf226	FCGR2B	BTK	AC126696.3	BACE2	UBD
Int.DC
TSPAN13	PPP1R14B	TCF4	PLD4	SEC61B	CLEC4C	LILRA4	SMPD3	BCL11A	GPR183
PLAC8	IL3RA	UGCG	IRF8	SPIB	CCDC50	TCL1A	ITM2C	SPCS1	ALOX5AP
RNASE6	CYB561A3	LAMP5	IRF7	TRAF4	SMIM5	MAP1A	HERPUD1	ZFAT	SCT
DNASE1L3	SERPINF1	PTCRA	MYBL2	IDH3A	DERL3	SLC15A4	PLEKHD1	CD4	IRF4
GAS6	FAM129C	GAPT	SCAMP5	TXN	PTGDS	SLC35F3	CIB2	CCDC88A	SELENOS
CLIC3	FCHSD2	COBLL1	WDFY4	MEF2C	EGLN3	HIGD1A	RNASET2	APP	MPEG1
EPHB1	NME8	LDLRAD4	VEGFB	HSP90B1	RAB11FIP1	SMC6	AC119428.2	SLC20A1	C12orf75
PMEPA1	PACSIN1	CUX2	TMEM8B	ZBTB18	RUBCNL	JAML	NEK8	LRRC26	PHEX
DRD4	TNFRSF21	P2RY6	EPHA2	CBFA2T3	AC011893.1	RGS2	ST6GALNAC4	LTB	PTPRS
BCL7A	GRASP	SCN9A	TLR7	GNG7	CD74	PROC	SLC12A3	FADS1	ASIP
Int.NK
CTSW	AREG	KLRD1	KLRF1	CD7	IL2RB	CMC1	XCL1	HOPX	XCL2
IFITM2	MATK	TNFRSF18	KLRC1	TRDC	GNLY	NCAM1	SRGAP3	MAFF	BTG1
SH2D1B	PTGDR	TSC22D3	CD300A	B3GNT7	DUSP2	CAPN12	KRT81	IER2	JUND
REL	ZFP36L2	HCST	KRT86	FXYD5	SPTSSB	SPINK2	TNFAIP3	CD44	SYTL3
ITGAX	TXK	TPT1	ADGRE5	CATSPER1	SAMD3	NCR1	AL157895.1	KIR2DL4	KLRB1
FAU	AHI1	SEPTIN7	MPG	DDIT4	RAC2	CLEC2B	FXYD7	STK17A	MAP3K8
ADGRG3	ID2	TCF7	AC020916.1	TNFSF14	GPR65	EEF1A1	PPP1R9A	CLDND1	METRNL
LINC00996	LINC01871	SLC39A10	JAK1	CD69	GFOD1	TSTD1	ARAP2	SELL	SLFN5
ARHGAP9	KMT2E	FOS	SEPTIN11	SH2D2A	NR4A1	PARP8	TMIGD2	PIK3R1	RNF125
LGALS9B	EVL	PLCB1	ABHD2	AC025164.1	MMP25-AS1	CHST12	CD2	TNFSF9	SPAG1
Int.B
JCHAIN	MZB1	IGKC	IGLC2	IGHM	IGLC3	IGHG1	TNFRSF17	SSR4	SEC11C
IGHA1	IGHG4	AC012236.1	IGHG3	IGLL5	PKHD1L1	DERL3	XBP1	IGHG2	FKBP11
IGLV1-44	POU2AF1	SCNN1B	IGLV2-14	LINC00582	IGHV3-33	HSP90B1	IGKV3-20	IGHGP	CD79A
IGHV3-23	PRDX4	SLC2A5	TNFRSF13B	IGLV6-57	IGHV5-10-1	IGHA2	AC004130.1	IGLV3-19	IGLV1-40
EAF2	IGHV4-59	FCRL5	IGHV3-48	CCR10	IGHV1-18	IGHV3-30	IGHV5-51	IGKV1-39	IGLV2-23
IGLV2-11	IGHV3-53	IGHV1-46	IGKV2-30	IGHV3-11	LINC01485	CPNE5	IGLC6	TXNDC5	IGLC7
IGHV1-3	DUSP26	IGKV4-1	IGKV3-15	IGLV1-47	AC021074.3	AC233755.2	IGKV1D-8	LINC02362	MYDGF
IGHV3-15	IGLV3-1	AL133467.1	IGKV1-9	IGHV3-74	IGHV3-7	IGHV6-1	IGHV3-21	IGHV7-4-1	IGLV2-8
IGHV3-64D	IGLV3-27	SMPDL3B	FCRL2	IGKV1-5	IGHV4-39	IGHV3-43	FAM30A	KLHL14	IGHV1-69D
SSR3	MYL2	SAMD7	IGLV3-25	IGHV2-70	IGHV3-49	LMAN1	IGLV7-46	ITM2C	RAB30
Int.Epi_1
CLDN3	KRT19	SOX9	CALML5	AQP5	GGT6	LINC01235	EHF	KRT7	FAM189A2
DANT2	PDE1C	FXYD3	TFCP2L1	STAC2	FOLH1	ESRRG	PART1	MESTIT1	WFDC2
SLC4A11	SCGB2A2	SFRP1	NAALADL2	CELF5	PPARGC1A	NECTIN4	MIA	EPCAM	MLPH
DCD	SORBS2	ZNF860	KRT15	PTCHD1	KIAA1549	SERTAD4	STXBP6	NFIB	WNK2
VPS37D	KRT18	CGNL1	ANXA3	ELF3	AARD	PRSS22	TDRP	MARCH1	SCGB3A1
MPZL2	DEPTOR	SLPI	AC092171.4	CD24	BARX2	CRNDE	SERTAD4-AS1	TBX3	TNNC2
RAVER2	IL12A	SPINT1-AS1	CMTM4	CACHD1	AC093827.5	KAZN	PPL	PTPRK	KLF5
NTN4	TMEM47	NPAS2	PLA2R1	CITED4	PTGES	RNF208	SNORC	TLE2	OBSL1
TBC1D30	CDS1	USP54	BCAR1	PTPRF	PERP	IRX2	KIAA1522	CADM4	OCLN
USP27X	PTPN20	KRT8	AL512306.2	LRP5	AL590560.2	ZNF585A	MCF2L	LRP11	SAMD12
Int.Epi_2
S100A14	COL17A1	DSP	KRT14	DSC3	KRT5	SFN	CCL27	AC005165.1	LGALS7B
PCDHB14	KRT6A	RHBDL2	KRT15	BNC1	ZNRF3	TRIM29	ADGRL3	ALDH3A1	DSG3
HES2	LYPD6B	RAB25	PCLO	PERP	AC068768.1	S100A2	KRT1	PTPRZ1	LAMC2
CAPNS2	FGFR2	KRBOX1	TP63	VSNL1	SFRP1	CXCL14	KRT17	AMOTL1	PKP3
PTPN3	ITGB4	SLC25A48	RAB17	FBLL1	BNIPL	AC079834.2	CDH1	DMKN	CCDC74B
CXADR	IRX5	THAP10	ANO1	AL732292.2	PTPRF	SH2D4A	F12	C2orf40	FBXO27
NFIA	SOX15	IRX6	SMOC2	EMP2	POU3F1	SERTAD4	PDLIM3	AJUBA	NTRK2
PHYHD1	EFNA3	KLF5	EPHB3	CTNND2	FXYD3	IL34	OLFM2	CYP1B1	AC008771.1
PLEK2	DST	SMO	PALMD	CTNNAL1	CELSR2	VWCE	NUDT12	FNDC10	ASAP2
TINCR	SEMA3F	ZNF462	NFIB	PCDH7	BCAM	MBIP	ZNF471	SOWAHC	KBTBD6
Int.Endo_1
CLEC14A	A2M	ADGRL4	VWA1	VWF	PLVAP	CD34	HSPG2	SPARCL1	RAMP3
APLNR	COL15A1	RAMP2	PODXL	ROBO4	ESAM	MMRN2	ENG	KDR	ARHGEF15
COL4A1	IGFBP7	MECOM	PTPRB	CDH5	EMCN	ECSCR	ADGRF5	SOX18	MCAM
PALMD	SEMA3F	RAPGEF4	TM4SF18	AQP1	ADAMTS9	SYNPO	FLT1	ARHGAP29	SLC9A3R2
PREX2	FAM167B	PCDH17	SHE	SHANK3	CALCRL	BCAM	JCAD	MYCT1	FZD4
PCDH12	AL583785.1	TSPAN12	NOSTRIN	CYYR1	EFNB2	CFI	FAM110D	PECAM1	TEK
SELE	TGM2	ERG	GNG11	CRIP2	CXorf36	BCL6B	SLCO2A1	GIPC2	AFAP1L1
THSD7A	STC2	NOVA2	DLL4	SPNS2	MEOX1	EGFL7	CX3CL1	RAB3C	TM4SF1
HYAL2	COL4A2	CXXC4	RBP7	CAV1	TSPAN7	FAM107A	CDH13	MEOX2	ACKR1
GJA4	CD93	SMAD9	EXOC3L2	EPAS1	INSR	SNCG	ITIH5	TIE1	HECW2
Int.Endo_2
CCL21	TFF3	MGP	CLDN5	LYVE1	SEMA3A	TFPI	PROX1	TM4SF1	PCDH17
ITIH3	LINC01197	MMRN1	ECSCR	PAEP	NTS	FLT4	SPOCD1	MYCT1	CAVIN2
UNC5A	NFIA-AS2	MYZAP	GPR143	HYAL2	CALCRL	BCHE	GNG11	VLDLR	LCN1
SMAD1	GJA1	C2CD4B	ARHGAP29	RHOJ	F2RL3	SEMA6A	SNCG	AC093909.4	RAMP2
EGFL7	IGF1	AFAP1L1	GPR182	COL22A1	PPFIBP1	PGM5	TNFAIP8L3	PCAT19	NRP2
EFNA5	MRC1	SOX18	PIEZO2	EDNRB	CXorf36	PCDH12	TEKT2	RELN	EFEMP1
STC1	FILIP1	SP6	TBX1	MTUS1	WFS1	SELENOP	RAPGEF5	TIMP1	INKA2
PDLIM3	SCN3B	BCL6B	RGS16	LRRC38	TMEM255B	PXDN	CFI	SLC6A17	PDE1A
IGFBP7	RBP1	ID1	CD163L1	HAND1	FAM189A2	ADAMTS7	AC013271.1	ADIRF	TIE1
LINC00636	TEK	PLA1A	FOXC2	LAMA4	NR2F2	GALNT18	MDFI	ARHGEF15	SCN3A
Int.Fibro_1
LUM	CTSK	RARRES2	C1S	COL6A1	COL6A3	COL6A2	DCN	PRRX1	MXRA8
FBLN1	C1R	MMP2	S100A13	PDGFRB	HTRA1	OLFML3	CALD1	EGFL6	CDH11
PCOLCE	TPM2	AEBP1	PPIC	CXCL12	FBLN2	COL3A1	FMO1	MDK	COL1A2
COL4A2	AC136628.4	SELENOM	ISLR	SERPING1	CFH	BICC1	MFAP2	MFAP4	ADAMTS2
CPXM1	CTHRC1	SSPN	IGFBP4	MMP11	CLMP	TUSC3	RND3	COL1A1	CDC42EP5
LAMB1	EFEMP2	PDGFRA	LGALS1	TWIST2	PTN	LTBP2	VIM	EMILIN1	LAPTM4A
GPM6B	FNDC1	BGN	TPBG	HMCN1	MME	POSTN	CD248	FRMD6	ECM1
ABCA6	LTBP1	LINC01116	PRRX2	LGALS3BP	TWIST1	DNM3OS	DPT	PPFIBP1	LRP1
TMEM158	NNMT	ANGPTL2	RAB13	CNN3	ANTXR1	CHN1	MRC2	BEX3	THBS2
COLEC12	DDR2	PCDH18	RUNX1T1	FAM20A	CYP7B1	GLT8D2	PTK7	SERPINF1	NT5E
Int.Fibro_2
TNC	COL5A2	COL5A1	SPARC	COL1A1	TAGLN	LMCD1	CTHRC1	SULF1	RCN3
COL1A2	SERPINH1	COL3A1	CTGF	LOX	WNT2	PDPN	COL12A1	MMP1	MYL9
CYR61	BGN	FN1	SELENOM	TPM1	AC136628.4	TNFRSF12A	MT1E	GREM1	MT2A
THBS1	TNFAIP6	FKBP10	STEAP1	UCHL1	XIRP1	FDCSP	TDO2	NNMT	ADAMTS2
MMP2	SLC39A14	COL16A1	ALPL	CREB3L1	LXN	LGALS1	DCN	MMP3	KDELR3
VCAN	MT1M	GPX8	CAVIN3	CALU	CRABP2	MIR503HG	ENAH	CERCAM	BMP1
ADAM12	CNN1	COPZ2	ITGA11	THY1	CA12	TPM2	MXRA5	PXDN	FSTL1
PCOLCE	IL33	ADAMTS4	CRISPLD2	PPIC	MDK	KDELR2	CNN3	LRRC17	P3H3
PDLIM7	CALD1	RAI14	CKAP4	DPYSL3	DACT1	PDGFRA	FRMD6	RCN1	C3orf67-AS1
CAVIN1	PRDX4	COL27A1	CH25H	PYCR1	COL8A1	S100A16	CSRP2	STEAP2	TMEM158
Int.Fibro_3
MFAP5	RARRES1	IGFBP5	PLAC9	SOD3	SERPINE2	PI16	CLU	PLA2G2A	IGFBP6
PTGIS	MGST1	ACKR3	CXCL14	NTRK2	FBN1	TIMP1	ADGRD1	ABI3BP	MT1M
THY1	OSR1	TNXB	ELN	SEMA3C	PDPN	S100A6	FSTL1	DPT	NNMT
FGF7	MT2A	IGFBP4	CFD	HSD11B1	LINC01133	HTRA3	FST	PRRX2	MT1E
PRSS23	PLA2G5	CCDC80	NGF	SRPX	EFEMP1	PTGES	ABCA8	SCARA3	TWIST2
S100A16	CAV1	C1R	GPC3	LOX	C3	LRRN4CL	MEDAG	PGF	ANGPTL4
PDGFRA	NT5E	S100A10	LOXL1	CBR3	FBLN1	STEAP1	MDK	LURAP1L	CXCL12
ANXA2	GPRC5B	LIMA1	ARHGAP29	AC245595.1	IFI6	AOX1	ASS1	LTBP1	EGFR
HMCN2	WNT4	ISLR	MME	CAVIN3	ADAMTS5	RND3	OSMR	LIPG	LRP1
GFPT2	PMP22	TMEM54	LRIG3	GOLM1	RAET1G	ALDH1A3	LVRN	CAVIN1	NOVA1
Int.SPTCL
CCL5	GZMA	NKG7	GZMH	CST7	GZMK	TIMD4	LAG3	PRF1	CD27
GNLY	CD3D	PTMS	S100A4	VCAM1	LYST	TIGIT	CXCR6	SH2D1A	CADM1
PHLDA1	IL32	APOBEC3G	DUSP5	HCST	AFAP1L2	CYTOR	CD2	LINC01871	LAIR2
PRDM1	HAVCR2	RUNX3	CSF1	RASD1	TRGC2	SIRPG	TRBC2	KLRC1	GZMB
RARRES3	RAB27A	CD3G	CD3E	IFI27L2	IKZF3	CD8A	SIT1	GAPDH	CBLB
DTHD1	NDFIP2	CORO1A	KLRG1	LINC01943	ETS1	RNF19A	SRP14	SH3BGRL3	LSP1
ATP5IF1	TENT5C	PYHIN1	ENTPD1	PDCD1	FASLG	SERPINB1	ZBTB38	C12orf75	TSPAN2
AC243829.4	EID1	LCK	ITGA1	AL158071.4	PFN1	LINC02195	JAKMIP1	DAPK2	SUB1
EOMES	LAT	CKLF	CD99	MCTP2	ATXN1	DUSP2	TRBC1	ADGRG1	VPS37B
GMFG	FAM3C	BHLHE40-AS1	CD52	LCP1	SNAP47	ID2	DGKH	TMSB4X	DOK2
Int.T_1
IL7R	PPP2R5C	SARAF	SMCHD1	CD3G	SPOCK2	LEF1	ZFP36L2	GPR155	TRAT1
GIMAP7	KLF2	TRAC	CD3E	GZMM	LEPROTL1	SYNE2	STK4	LYAR	GYPC
RIPOR2	AES	EPB41	PIK3R1	TCF7	PASK	CD3D	CAMK4	N4BP2L2	PTPRC
TMSB4X	PDE3B	CD52	FAU	ODF2L	TPT1	PIK3IP1	CLEC2D	EEF1A1	STK17A
HLA-E	ATM	STAT1	SLFN5	EEF1D	SF1	RIC3	PABPC1	CXCR4	DGKA
BCL11B	FCMR	SAMD9	LIMD2	LCK	XAF1	IFI44L	CDC14A	RNF213	GCC2
TRIM22	PNISR	CYTIP	IFNG-AS1	PRMT2	DNAJB1	TSC22D3	FAM118A	OXNAD1	NUCB2
TRGC2	AQP3	ANKRD12	TMEM123	SH3YL1	RCAN3	GPR171	EVL	OCIAD2	NCK2
NSD3	EIF4A2	AP3M2	ARHGDIB	TRBC1	IKZF1	IL32	DDX5	CDKN1B	CDC42SE2
TNRC6B	NOP53	ZNF683	EZR	PPM1K	FAM102A	MAL	GIMAP1	ACAP1	BTG1
Int.T_2
TNFRSF4	FOXP3	PPM1N	ICOS	CTLA4	GNG8	CORO1B	IL2RA	CXCL13	S100A4
AC133644.2	BATF	LINC01943	IL32	TNFRSF18	SPOCK2	CD28	FANK1	TIGIT	PTGIR
TRAC	LAYN	F5	LAIR2	DIRAS3	LINC02099	AC017002.3	RTKN2	DLGAP1	TBC1D4
TNFRSF25	CD177	MAF	MYL6	ARG2	IGFL2	COX5A	ICA1	PGM2L1	HLF
ACTG2	GAPDH	DNPH1	CARD16	SOD1	PTPRR	RORA	LINC01727	ZG16B	PRDX2
OSBPL6	AL359834.1	ZC3H12D	CALM3	FOXA3	CD2	SATB1	JPT1	GMFG	HINT1
MIR4435-2HG	YWHAB	RGS10	NMB	INSM1	CACNB2	CXCR6	CD79B	TNFRSF1B	SMS
ZNRF1	FRRS1L	ARHGDIB	NDUFV2	LINC02195	ATP5IF1	AC034229.4	HTATIP2	DUSP16	PFN1
SNX9	SLC1A1	GALM	KIAA0319L	TNFRSF8	ADTRP	GADD45A	TESC	PVALB	PKM
POU2F2	TSHR	MAGEH1	ARID5B	TTC39C	SPATS2L	HACD1	MARCH3	AICDA	CADM1
Int.Macro_1
FSCN1	MARCKSL1	CCL19	EBI3	BASP1	LAD1	LAMP3	CCR7	GPR157	SLCO5A1
PPA1	CSF2RA	TXN	BIRC3	ACHE	TUBB2B	TVP23A	LOR	HMSD	LIMCH1
ANKRD33B	CCL22	CD83	MAP3K13	RASSF4	AOC1	DAPP1	NCCRP1	TMSB10	NUB1
TNFAIP2	TREML1	GCGR	NET1	PRAME	GPX4	FLT3	TUBA1C	BCL2L14	NRXN2
IDO1	CD80	ARHGAP22	CRLF2	SYNPO2	NABP1	GSN	CLIC2	CFLAR	GSTP1
INSM1	SYNGR2	TNNT2	CD86	RASGRF1	EBF4	NRP2	TSPAN33	KIAA1211	LSP1
SLC22A23	HLA-DOB	TSPAN15	SERPINB10	KCNN1	NAV1	CCL17	RAB9A	NPFFR1	ENTHD1
CD200	SAMSN1	ANXA3	C6orf223	TUBB6	IL12B	GNG5	CDKN1A	ALPK2	CXCL9
UBD	SPIC	RAB10	WNT5B	TUBB2A	ZNF366	TRAF1	LGALS2	TBC1D4	PTPN1
AFDN	NEURL3	RUFY3	ALDH2	CD40	SYNPO	BCL2A1	PTGIR	MYL6	TMEM176A
Int.Macro_2
HLA-DPA1	HLA-DPB1	HLA-DRB5	CST3	HLA-DRA	HLA-DRB1	C1QB	TMSB10	AIF1	HLA-DQA1
C1QA	HLA-DQB1	C1QC	CD74	C1orf162	TYROBP	FGL2	PSME2	LST1	MS4A6A
PRDX1	VAMP5	POMP	HLA-DMA	ACTB	FCGR1A	S100A11	PYCARD	CLEC10A	TYMP
TUBA1B	C1orf54	PAK1	GLRX	IFI30	LAP3	SPI1	VAMP8	TUBA1A	PRELID1
IGSF6	LGALS2	CD33	IFI27	FCER1G	TMEM176B	CYBA	LY86	PLEKHO1	CPVL
SCIMP	TPMT	CTSH	SMCO4	LMO2	AKR1A1	HLA-DMB	ANKRD22	PDIA3	RAC1
RNH1	YWHAH	RAB32	CALHM6	SLAMF8	TMEM176A	FCGR1B	UCP2	CSF1R	OAZ1
SERPINA1	CALR	MNDA	IFNGR2	IFITM3	PPA1	CD72	CASP1	EFHD2	ARPC3
NPC2	FCGRT	SUCNR1	ATOX1	RGS10	LPCAT2	CLEC7A	MARCH1	ALDH2	TGFBI
ANXA2	PSMA4	LRRC25	RARRES3	PLBD1	CHCHD10	NAGK	PILRA	SHTN1	ARPC1B
Int.Macro_3
G0S2	C15orf48	FBP1	SNX10	CD14	NINJ1	INHBA	CCL2	CTSL	FTH1
AQP9	CLEC4E	CCL8	PLAUR	PTAFR	SOD2	LILRB4	DRAM1	GLUL	SLC11A1
FCER1G	CEBPB	FCGR3A	CCL7	C3AR1	IL1R2	PLA2G7	CALHM6	ANKRD22	GSTO1
CD163	CEMIP	FPR3	PLAU	DEFB1	CD274	C5AR1	LINC01094	CD300E	SDCBP
CTSB	S100A11	PILRA	TREM1	MS4A4A	ACP2	IDO1	SLC43A2	SIRPA	CXCL8
BRI3	DMXL2	NECTIN2	FCGR2A	PDCD1LG2	IL4I1	OLR1	CXCL16	LRP12	LHFPL2
KYNU	ANXA5	MS4A7	CCL18	CD44	ARNT2	CTSC	RALA	SMIM25	FNIP2
KLHDC8B	CAPG	S100A10	CTSH	GPR84	SRGN	SLC39A8	RAB20	CYSTM1	FNDC3B
SLC7A7	CD80	CREG1	MPP1	PNRC1	CD40	BCL2A1	FMNL2	LAIR1	OSCAR
ADAMDEC1	ABCA1	ATOX1	CLEC4D	HBEGF	GRB2	CMKLR1	LILRB3	LAMB3	CSTB
Int.Macro_4
IFIT1	IFIT3	RSAD2	TNFSF10	APOBEC3A	IL1RN	ISG15	WARS	IFIT2	FCN1
MX1	CXCL11	CXCL10	NAMPT	DDX58	S100A9	MNDA	GCH1	FPR1	LILRA5
SAT1	MX2	TNFSF13B	GBP1	S100A8	ANXA2R	SSB	S100A12	GK	DUSP6
IL27	LYZ	PLEK	HES4	ISG20	H3F3B	DEFB1	RETN	SERPINB9	SOCS1
IFIH1	APOBEC3B	HERC5	SECTM1	SAMD4A	ACSL1	HESX1	CASP1	CFP	ATF5
BAZ1A	NLRP3	DYNLT1	EPSTI1	KCTD12	HPSE	GBP4	LILRB2	NCF1	MARCKS
DSE	MIR3945HG	TREM1	CD300E	HSPA1A	CCR1	ACOD1	PARP14	CKAP4	LMO2
LYN	SERPINB1	RIN2	LACTB	GNB4	SCIMP	GCA	RGL1	DDX60L	ADGRE2
GBP5	FPR2	P2RY13	SLC31A2	VAMP5	GLUL	RNF19B	OASL	SLC25A37	THEMIS2
NECTIN2	FCGR2A	IFI16	PLSCR1	CSTA	TOP1	DNAJA1	CCL8	NEXN	FGL2
Int.Macro_5
APOC1	APOE	FTL	GPNMB	CTSD	CTSB	LGMN	LGALS3	TREM2	CTSZ
CD68	GCHFR	VSIG4	CTSC	ASAH1	ACP5	CSTB	CAPG	NPL	CTSL
C1QA	C1QC	PLD3	PSAP	CD63	GRN	SCPEP1	PRDX1	GM2A	NUPR1
LIPA	RAB42	KCNMA1	TSPAN4	FCGRT	C1QB	ATP6V1F	OTOA	NR1H3	CHI3L1
PLA2G7	CTSS	BLVRB	ATP6V0B	CREG1	NOP10	BRI3	TIMP2	LINC01914	NPC2
DNASE2	PKD2L1	CD81	MPP1	SULT1C2	HSD17B14	ALDH1A1	C2	MS4A4A	TMEM37
HNMT	RRAGD	SMPDL3A	CTSA	MMP12	CD9	ATOX1	LY96	RNF130	ACP2
SCARB2	MGLL	HEXA	CYP27A1	MGST3	HEXB	MYDGF	ATP6V0E1	ADAMDEC1	FCER1G
SCD	TCN2	SLCO2B1	AKR1A1	PLTP	KLHDC8B	MSR1	RMDN3	APOC2	HTRA4
TMEM251	HAMP	VAT1	DNASE2B	CPM	L3MBTL4-AS1	CXCL16	LAPTM5	FABP3	HLA-DMA
Mus.contraction
NDUFA4L2	COX4I2	AVPR1A	PDE1A	OR51E1	TEX41	ECEL1	HSD11B2	HIGD1B	ABCC9
BANCR	EDNRA	LINGO1	SPRN	KCNJ8	FAM162B	FOXS1	NOTCH3	TBX2	SPARCL1
RGS5	AC109479.1	AL590999.1	NPNT	EPHA3	COL18A1	AC007406.3	GUCY1A2	LYPD1	TFPI
PDE3A	ENPEP	MYL9	DKK3	ADCYAP1R1	COL5A3	IGFBP7	THY1	COL4A1	REM1
EBF2	PITX3	MYLK	TRPC6	ADGRF5	GJA4	KCNS3	B3GALT1	CYGB	C11orf96
WFDC1	CALD1	COL4A2	TPPP3	C11orf91	LHFPL6	PRSS23	COLEC11	NR2F2	LURAP1L
MYO1B	PEAR1	ITGA1	SLC7A2	IL17B	MEST	NID2	AC140912.1	NFASC	CCDC102B
GJC1	RERG	MCAM	EGFLAM	LPL	SPARC	CAV1	PDGFRB	PABPC5	FILIP1L
ID4	EPS8	COX7A1	AC046168.2	PLPPR4	TCIM	MAP2	UACA	CD163L1	TSPAN15
SLC22A3	SFTA1P	CXCL9	ANO4	IBSP	NID1	PAMR1	TBX2-AS1	AC090409.1	ANO1
Act.Macro
IER3	NFKBIA	GADD45B	IL1B	DUSP1	TNF	ZFP36	IER2	ATF3	FOS
CXCL2	JUNB	SOCS3	BCL2A1	CCL3L1	PPP1R15A	FOSB	JUN	EGR1	NFKBIZ
KLF6	AC007952.4	NAMPT	KLF4	NR4A1	NLRP3	TNFAIP3	ARL5B	PLEK	SOD2
CD83	ICAM1	CCL3	AC245014.3	NR4A2	EREG	CXCL3	DUSP2	PDE4B	SLC2A3
BTG2	CDKN1A	PLAUR	PTGS2	SGK1	ATP2B1-AS1	CHMP1B	CXCL8	KDM6B	CCRL2
CD69	HBEGF	AC015912.3	IL6	HCAR2	TAGAP	PPP1R15B	EGR2	NEAT1	NR4A3
TRIB1	OLR1	CCL4L2	SAT1	PNRC1	CSRNP1	KLF10	TNFAIP2	VEGFA	S100A9
CSTA	C5AR1	RIPK2	CCL20	IL1A	STX11	AC016831.1	MCL1	LUCAT1	ZNF331
RGS2	HCAR3	ATP1B3	GPR84	CYB5D1	EIF1	AP1S2	YBX3	IRF1	THAP2
AC007032.1	AC090527.3	JUND	PIM3	AC073352.2	NAF1	CEBPD	PHACTR1	CLEC7A	FCN1
Proliferation
UBE2C	H2AFZ	STMN1	TOP2A	TUBA1B	NUSAP1	TUBB	HIST1H4C	CDKN3	HMGB2
PCLAF	TYMS	CDK1	BIRC5	CKS1B	HMMR	CENPF	DLGAP5	MKI67	CENPW
ASPM	RRM2	UBE2T	TPX2	CENPA	TUBB4B	CDCA3	AURKB	SPC25	PBK
HMGB1	CCNB1	ZWINT	HMGN2	CCNB2	PTTG1	GTSE1	HIST1H1B	NCAPG	CENPE
UBE2S	CCNA2	MND1	CKS2	DUT	TK1	KIF2C	MAD2L1	CEP55	NUF2
DEPDC1	CDC20	HMGB3	KIF23	KIF11	ANLN	TTK	SGO2	PLK1	MXD3
KPNA2	CDCA8	CKAP2L	KIFC1	AURKA	H2AFX	HJURP	CDCA2	KNL1	RAN
TUBA1C	CDCA5	HIST1H1D	SMC4	SHCBP1	JPT1	PTMA	H2AFV	MELK	FOXM1
DTYMK	KIF15	ESCO2	HIST1H3B	NDC80	CENPN	BUB1B	CCDC34	CENPU	PCNA
SGO1	TROAP	PPIA	E2F8	RAD51AP1	CLSPN	KIF4A	ASF1B	PIMREG	PKMYT1
Act.T
TNFRSF9	FABP5	CRTAM	ZBED2	GZMB	CCL4	GNG4	CCL3	IFNG	HSP90AB1
PKM	CXCL13	GAPDH	TNIP3	PGAM1	MIR155HG	RGCC	CDK6	CCL4L2	CCL1
MYOD1	FAM3C	SHC4	NPM1	NMB	PARK7	NME1	SRRT	TNFRSF1B	TIGIT
PDLIM4	NDFIP2	ARL3	RANBP1	CD70	RAN	TBC1D4	BATF	BIRC3	XCL2
UBE2F	CD82	PIM3	ZBTB32	GEM	TNFRSF18	ID3	LINC01281	HSPE1	C1QBP
NPW	NDUFV2	HSPD1	EGR2	RPA3	LAG3	PHLDA1	DUSP4	CYTOR	PLS3
TIE1	SNRPD1	TPI1	LINC01033	BHLHE40-AS1	C16orf45	RGS16	SQLE	FASLG	RAMP1
CDC20	PAICS	MAP2K3	RAB27A	ATP9A	SNRPB	SNX9	SERPINB1	TSPAN2	MTSS1
IQCG	TIMM8A	ATP5MC3	TIMD4	TNS3	SOD1	CD72	ENO1	CADM1	EEF1E1
CD8A	BTG3	SIT1	REL	PFDN2	GYS2	EOMES	AC007388.1	AC114550.1	ZC3H12C
