# Supplementary material for: Single-Cell RNA-seq Reveals Characteristics of Malignant Cells and Immune Microenvironment in Subcutaneous Panniculitis-Like T-Cell Lymphoma
Source: Front Oncol. 2021 Mar 18;11:611580. doi: 10.3389/fonc.2021.611580 (PMC8013729; doi:10.3389/fonc.2021.611580)
Supplement: Supplementary file 3 [file Table_2.xlsx]

## Sheet: Sheet1
Supplementary Table S2. List of the highly significant DE genes
	p_val	avg_logFC	pct.1	pct.2	p_val_adj
GZMA	0	1.97364	0.965	0.304	0
GNLY	0	1.88843	0.968	0.401	0
CYTOR	0	1.76574	0.77	0.041	0
IFI27	0	1.68035	0.483	0.072	0
TIMD4	0	1.67723	0.645	0.031	0
CXCL13	0	1.66894	0.43	0.012	0
FABP5	0	1.64201	0.741	0.214	0
GZMK	0	1.63597	0.877	0.226	0
VCAM1	0	1.46329	0.49	0.008	0
CD99	0	1.44375	0.842	0.113	0
KLRC1	0	1.43086	0.715	0.122	0
SEM1	0	1.39067	0.744	0.082	0
CD81	0	1.39002	0.824	0.154	0
HAVCR2	0	1.38866	0.644	0.067	0
ELOB	0	1.36789	0.795	0.104	0
NR4A2	0	1.346	0.567	0.069	0
TRIR	0	1.32809	0.788	0.103	0
DUSP2	0	1.30541	0.837	0.354	0
CD38	0	1.28469	0.589	0.055	0
LINC01871	0	1.28008	0.508	0.023	0
JPT1	0	1.26976	0.575	0.057	0
HMGB2	0	1.26861	0.625	0.275	0
RACK1	0	1.26774	0.934	0.17	0
MTRNR2L12	0	1.26108	0.885	0.152	0
SERPINB1	0	1.24453	0.796	0.285	0
TRDC	0	1.23233	0.63	0.11	0
LAIR2	0	1.2296	0.37	0.029	0
RASD1	0	1.21775	0.234	0.004	0
JUND	0	1.12877	0.911	0.306	0
NKG7	0	1.12874	0.998	0.646	0
STMN1	0	1.1274	0.412	0.172	0
GZMH	0	1.10447	0.881	0.315	0
CD27	0	1.10279	0.791	0.248	0
PCLAF	0	1.09061	0.3	0.009	0
RTRAF	0	1.0715	0.615	0.071	0
COTL1	0	1.0606	0.853	0.421	0
METRNL	0	1.05038	0.592	0.095	0
TYMS	0	1.04784	0.286	0.014	0
LYST	0	1.04622	0.769	0.232	0
FYB1	0	1.04447	0.714	0.112	0
PYCARD	0	1.04415	0.699	0.169	0
SELENOK	0	1.03714	0.646	0.085	0
SLC25A6	0	1.01775	0.628	0.086	0
SELENOH	0	1.00785	0.581	0.073	0
CD63	0	1.00263	0.949	0.542	0
PTMS	0	0.995863	0.815	0.309	0
ENTPD1	0	0.989298	0.391	0.023	0
TNFAIP3	0	0.985903	0.711	0.258	0
MKI67	0	0.983329	0.282	0.01	0
COPS9	0	0.97697	0.599	0.073	0
SELENOS	0	0.976784	0.487	0.043	0
HLA-DPB1	0	0.973709	0.838	0.283	0
ARL6IP4	0	0.970737	0.602	0.081	0
TNFSF9	0	0.969133	0.267	0.01	0
CRTAM	0	0.961831	0.325	0.067	0
CADM1	0	0.947414	0.427	0.041	0
PRF1	0	0.923333	0.915	0.382	0
LCP1	0	0.921483	0.865	0.404	0
HCST	0	0.912292	0.972	0.602	0
TNFRSF9	0	0.912183	0.452	0.121	0
RNF19A	0	0.903124	0.65	0.213	0
ANXA5	0	0.899166	0.647	0.173	0
ELOC	0	0.897694	0.472	0.047	0
PAXX	0	0.896579	0.583	0.082	0
MCTP2	0	0.896231	0.401	0.049	0
ID3	0	0.885269	0.349	0.057	0
CENPF	0	0.884564	0.219	0.011	0
NDUFV2	0	0.882273	0.608	0.163	0
TSPAN2	0	0.881968	0.377	0.025	0
AHI1	0	0.875537	0.439	0.077	0
GRK2	0	0.873026	0.465	0.049	0
UBE2S	0	0.870398	0.501	0.171	0
AFAP1L2	0	0.865083	0.315	0.006	0
PTTG1	0	0.862919	0.385	0.096	0
S100A4	0	0.859078	0.969	0.653	0
ITGB2	0	0.850831	0.783	0.292	0
CCDC50	0	0.845822	0.365	0.041	0
DUSP4	0	0.843288	0.424	0.078	0
UBE2C	0	0.842786	0.186	0.011	0
TENT5C	0	0.841994	0.34	0.028	0
LAG3	0	0.835966	0.825	0.348	0
SELENOT	0	0.833542	0.472	0.055	0
ASPM	0	0.823782	0.195	0.007	0
RTF2	0	0.818644	0.446	0.046	0
DUSP5	0	0.817694	0.552	0.186	0
KIR2DL4	0	0.80493	0.264	0.009	0
TIGIT	0	0.800772	0.704	0.241	0
CENPX	0	0.800293	0.361	0.033	0
RGS1	0	0.799344	0.717	0.269	0
CLIC1	0	0.799002	0.946	0.635	0
HMGB1	0	0.793107	0.918	0.711	0
SELENOF	0	0.789448	0.466	0.062	0
PHLDA1	0	0.789364	0.563	0.182	0
SELENOW	0	0.787071	0.479	0.065	0
KLRD1	0	0.779626	0.842	0.355	0
CSF1	0	0.776601	0.307	0.053	0
REX1BD	0	0.773648	0.492	0.071	0
HIST1H1D	0	0.7736	0.262	0.025	0
APOBEC3G	0	0.772366	0.821	0.367	0
STMP1	0	0.768113	0.413	0.045	0
LINC01943	0	0.757287	0.255	0.01	0
PLA2G16	0	0.755694	0.526	0.111	0
CTSW	0	0.750591	0.771	0.328	0
UFD1	0	0.748618	0.38	0.034	0
CCL4	0	0.748186	0.837	0.408	0
SIRPG	0	0.748098	0.307	0.027	0
DYNLL1	0	0.746707	0.821	0.438	0
NOP53	0	0.740095	0.56	0.101	0
SQOR	0	0.739059	0.357	0.032	0
SMIM26	0	0.738489	0.431	0.055	0
BICDL1	0	0.738208	0.296	0.021	0
NSD3	0	0.733567	0.499	0.077	0
CCL5	0	0.731693	0.992	0.748	0
MT1E	0	0.730496	0.367	0.057	0
CD74	0	0.729789	0.934	0.614	0
MTSS1	0	0.726618	0.303	0.023	0
SMC4	0	0.72365	0.393	0.09	0
PLCG2	0	0.720583	0.379	0.052	0
LAT	0	0.717791	0.522	0.133	0
EID1	0	0.709401	0.775	0.389	0
HIST1H1C	0	0.707831	0.287	0.038	0
CYBC1	0	0.694738	0.365	0.041	0
CCL3	0	0.692075	0.696	0.219	0
NUSAP1	0	0.68934	0.211	0.014	0
GOLIM4	0	0.685635	0.294	0.026	0
CHMP4A	0	0.685087	0.554	0.146	0
CXCR6	0	0.684342	0.329	0.072	0
CST7	0	0.683685	0.968	0.622	0
SPTAN1	0	0.680433	0.451	0.125	0
REL	0	0.675338	0.515	0.179	0
BST2	0	0.67307	0.821	0.43	0
RAB5IF	0	0.671861	0.329	0.031	0
TK1	0	0.670835	0.225	0.012	0
OGA	0	0.670036	0.324	0.041	0
IQGAP1	0	0.669597	0.647	0.237	0
MXD4	0	0.66847	0.379	0.079	0
SH2D1A	0	0.668371	0.633	0.253	0
POLR2F	0	0.668295	0.348	0.035	0
TNFSF10	0	0.66763	0.605	0.189	0
VPS37B	0	0.662688	0.372	0.084	0
KRTCAP2	0	0.65715	0.4	0.061	0
HIKESHI	0	0.657065	0.333	0.032	0
NDUFAF8	0	0.653159	0.349	0.041	0
TRGC2	0	0.652571	0.671	0.25	0
MIS18BP1	0	0.649313	0.385	0.075	0
ATAD2	0	0.646598	0.288	0.036	0
GBP5	0	0.645669	0.671	0.265	0
WASHC3	0	0.645597	0.342	0.036	0
GPR174	0	0.645421	0.306	0.033	0
DGKH	0	0.640012	0.239	0.027	0
IGKC	0	0.636744	0.326	0.077	0
CTLA4	0	0.636699	0.339	0.072	0
KIAA1551	0	0.633709	0.578	0.202	0
METTL26	0	0.630434	0.34	0.039	0
CTSD	0	0.6191	0.581	0.184	0
NRDC	0	0.618216	0.336	0.041	0
TMBIM4	0	0.61805	0.571	0.169	0
ISG15	0	0.615599	0.952	0.528	0
CDKN3	0	0.615306	0.212	0.013	0
DOK2	0	0.613319	0.491	0.158	0
SAMD3	0	0.610849	0.431	0.089	0
TYMP	0	0.603795	0.843	0.444	0
BUD23	0	0.60305	0.331	0.039	0
RAMMET	0	0.601689	0.304	0.03	0
CALM3	0	0.600168	0.73	0.378	0
IFI6	0	0.598453	0.84	0.403	0
RARRES3	0	0.589497	0.867	0.524	0
MESD	0	0.582563	0.302	0.035	0
TMEM238	0	0.581737	0.314	0.037	0
PSMB9	0	0.579262	0.934	0.682	0
SEC11A	0	0.578415	0.708	0.343	0
CENPM	0	0.577299	0.283	0.045	0
BOD1L1	0	0.572791	0.459	0.124	0
AKAP5	0	0.572246	0.236	0.031	0
CLSPN	0	0.571649	0.227	0.014	0
NBDY	0	0.569173	0.321	0.046	0
EFHD2	0	0.568166	0.605	0.237	0
TAF10	0	0.566842	0.522	0.18	0
ITGA4	0	0.565346	0.453	0.145	0
ARF5	0	0.562451	0.396	0.097	0
BHLHE40-AS1	0	0.56053	0.179	0.008	0
ZBTB38	0	0.560022	0.377	0.103	0
TLN1	0	0.558884	0.569	0.221	0
CTSC	0	0.558669	0.678	0.286	0
TUT7	0	0.555689	0.251	0.028	0
CCR1	0	0.554283	0.223	0.024	0
TNS3	0	0.547066	0.172	0.004	0
SKA2	0	0.544556	0.378	0.096	0
PSTPIP1	0	0.543528	0.464	0.143	0
CD84	0	0.534162	0.449	0.142	0
TPX2	0	0.533303	0.175	0.008	0
HIST1H1E	0	0.533141	0.209	0.021	0
IFI16	0	0.520409	0.781	0.429	0
H1FX	0	0.519862	0.594	0.257	0
TUT4	0	0.51939	0.304	0.049	0
SRPRA	0	0.517942	0.247	0.028	0
MSN	0	0.517613	0.738	0.379	0
LINC02195	0	0.51575	0.165	0.005	0
ITGB1	0	0.511839	0.587	0.251	0
MCRIP1	0	0.510534	0.271	0.031	0
GNAI2	0	0.506491	0.688	0.332	0
LGALS9	0	0.502952	0.324	0.072	0
CENPW	0	0.500955	0.214	0.019	0
ARHGAP45	0	0.50009	0.273	0.038	0
ETS1	4.94E-324	0.501704	0.715	0.364	9.61E-320
TOP2A	3.45E-323	0.721909	0.175	0.01	6.72E-319
TMX4	5.38E-322	0.520541	0.383	0.112	1.04E-317
CEBPD	7.70E-322	0.556049	0.328	0.081	1.49E-317
NFATC3	2.41E-321	0.511443	0.37	0.104	4.68E-317
CBLB	1.02E-320	0.577864	0.526	0.204	1.99E-316
FASLG	5.24E-319	0.576785	0.348	0.086	1.02E-314
MCM5	9.29E-319	0.593344	0.297	0.057	1.80E-314
PARK7	4.01E-315	0.557296	0.853	0.604	7.81E-311
GOLGB1	8.80E-313	0.554967	0.384	0.113	0
OTULIN	2.11E-312	0.527564	0.362	0.098	4.12e-308
GEM	0	0.596268	0.166	0.009	8.73e-305
HIST1H1B	6.79e-304	0.50353	0.146	0.005	1.32e-299
RRM2	1.69e-303	0.52459	0.155	0.007	3.29e-299
SNRPD3	1.54e-299	0.555486	0.617	0.282	2.99e-295
HELLS	1.76e-298	0.532365	0.237	0.034	3.41e-294
RUNX3	5.56e-296	0.522676	0.736	0.399	1.08e-291
SMC3	6.5e-296	0.503378	0.506	0.2	1.26e-291
SEC14L1	2.18e-293	0.516697	0.328	0.083	4.24e-289
PTPRJ	1.66e-290	0.507465	0.268	0.053	3.22e-286
CARHSP1	6.52e-287	0.542006	0.497	0.193	1.27e-282
ZNF331	3.86e-286	0.747244	0.352	0.095	7.5e-282
TMPO	1.8e-285	0.597747	0.414	0.134	3.5e-281
KLRC2	3.87e-285	0.550713	0.335	0.097	7.52e-281
FCER1G	6.67e-283	0.686407	0.285	0.067	1.3e-278
JUN	2.51e-275	0.534554	0.449	0.171	4.89e-271
DTHD1	1.38e-273	0.516021	0.218	0.035	2.68e-269
HMGN2	2.19e-267	0.755075	0.683	0.46	4.26e-263
UBE2T	9.62e-266	0.516822	0.229	0.037	1.87e-261
TYROBP	1.92e-260	0.573296	0.292	0.081	3.73e-256
SRRT	9.95e-259	0.55101	0.387	0.126	1.94e-254
TNFRSF1B	2.75e-256	0.569801	0.514	0.22	5.36e-252
IGF2R	3.77e-255	0.517633	0.3	0.078	7.33e-251
FCRL3	1.48e-254	0.508078	0.242	0.051	2.88e-250
CKS2	4.83e-250	0.675768	0.401	0.139	9.39e-246
IGLC2	2.3e-246	0.756448	0.193	0.031	4.48e-242
NUDT1	1.04e-241	0.526206	0.39	0.135	2.03e-237
PCNA	3.9e-238	0.666226	0.323	0.093	7.58e-234
NASP	5.53e-206	0.556161	0.459	0.2	1.08e-201
CLIC3	1.96e-203	0.595129	0.276	0.086	3.8e-199
FAM3C	3.24e-197	0.557183	0.424	0.179	6.3e-193
UBE2F	1.35e-186	0.654747	0.387	0.159	2.62e-182
CKS1B	2.19e-164	0.578604	0.297	0.107	4.26e-160
IGLC3	2.48e-153	0.505192	0.115	0.016	4.82e-149
HIST1H4C	9.24e-153	0.951781	0.518	0.304	1.8e-148
DUT	6.93e-143	0.635256	0.446	0.252	1.35e-138
